1 **Long solids retention times and attached growth phase favor prevalence of comammox**  
2 **bacteria in nitrogen removal systems.**

3  
4 Irmarié Cotto<sup>1</sup>, Zihan Dai<sup>2</sup>, Linxuan Huo<sup>1</sup>, Christopher L. Anderson<sup>1</sup>, Katherine J. Vilaridi<sup>1</sup>, Umer  
5 Ijaz<sup>2</sup>, Wendell Khunjar<sup>3</sup>, Christopher Wilson<sup>4</sup>, Haydee De Clippeleir<sup>5</sup>, Kevin Gilmore<sup>6</sup>, Erika  
6 Bailey<sup>7</sup>, Ameet J. Pinto<sup>1\*</sup>.

7  
8 1 Department of Civil and Environmental Engineering, Northeastern University.

9 2 School of Engineering, University of Glasgow.

10 3 Hazen and Sawyer, Inc.

11 4 Hampton Roads Sanitation District.

12 5 DC Water.

13 6 Department of Civil and Environmental Engineering, Bucknell University.

14 7 City of Raleigh Public Utilities.

15

16 \*corresponding author: [a.pinto@northeastern.edu](mailto:a.pinto@northeastern.edu)

17

18 Keywords: comammox bacteria, nitrification, solids retention time, qPCR, metagenomics

19

20

21

22 **Highlights**

- 23 • Clade A comammox bacteria were detected in wastewater nitrogen removal systems.
- 24 • New qPCR assay targeting the *amoB* gene of clade A comammox bacteria was developed.
- 25 • Comammox bacteria are prevalent in mainstream conventional and simultaneous  
26 nitrification-denitrification systems with long solids retention times (>10 days).
- 27 • Comammox bacteria were not detected in sidestream partial nitrification-anammox  
28 systems included in this study.

29

# GRAPHICAL ABSTRACT

30

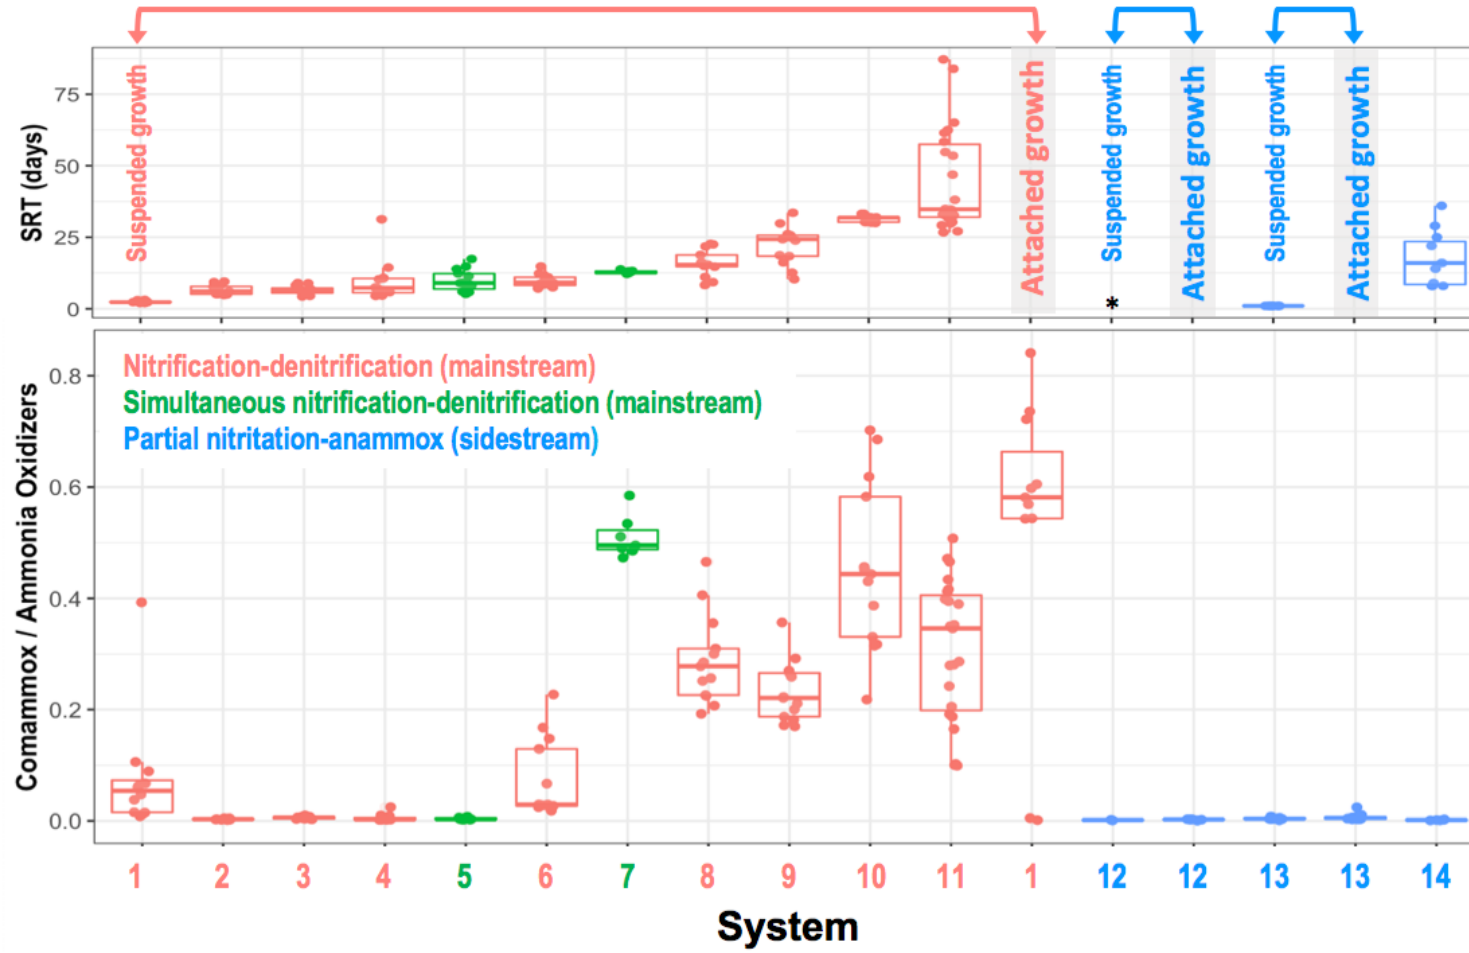

31

32 **ABSTRACT**

33 The discovery of the complete ammonia oxidizing (comammox) bacteria overturns the traditional  
34 two-organism nitrification paradigm which largely underpins the design and operation of nitrogen  
35 removal during wastewater treatment. Quantifying the abundance, diversity, and activity of  
36 comammox bacteria in wastewater treatment systems is important for ensuring a clear  
37 understanding of the nitrogen biotransformations responsible for ammonia removal. To this end,  
38 we conducted a yearlong survey of 14 full-scale nitrogen removal systems including mainstream  
39 conventional and simultaneous nitrification-denitrification and side-stream partial nitrification-  
40 anammox systems with varying process configurations. Metagenomics and genome-resolved  
41 metagenomics identified comammox bacteria in mainstream conventional and simultaneous  
42 nitrification-denitrification systems, with no evidence for their presence in side-stream partial  
43 nitrification-anammox systems. Further, comammox bacterial diversity was restricted to clade A  
44 and these clade A comammox bacteria were detected in systems with long solids retention times  
45 (>10 days) and/or in the attached growth phase. Using a newly designed qPCR assay targeting the  
46 *amoB* gene of clade A comammox bacteria in combination with quantitation of other canonical  
47 nitrifiers, we show that long solids retention time is the key process parameter associated with the  
48 prevalence and abundance of comammox bacteria. The increase in comammox bacterial  
49 abundance was not associated with concomitant decrease in the abundance of canonical nitrifiers;  
50 however, systems with comammox bacteria showed significantly better and temporally stable  
51 ammonia removal compared to systems where they were not detected. Finally, in contrast to recent  
52 studies, we do not find any significant association of comammox bacterial prevalence and  
53 abundance with dissolved oxygen concentrations in this study.

54

55

56

57

58

59

60

61

62

## 63 **1.0 Introduction**

64 Nitrification, the oxidation of ammonia to nitrate via nitrite, coupled with denitrification where  
65 nitrate is reduced to dinitrogen gas are key processes in the removal of nitrogen from wastewater  
66 (Klotz and Stein 2008). Traditionally, nitrification was considered as a two-step process driven by  
67 two distinct nitrifying guilds, i.e., ammonia oxidation by the aerobic ammonia oxidizing bacteria  
68 (AOB) (Kowalchuk and Stephen 2001) or archaea (AOA) (Stahl et al. 2012) followed by nitrite  
69 oxidation by the aerobic nitrite oxidizing bacteria (NOB) ((Daims et al. 2016). Ammonia oxidizers  
70 within the *Betaproteobacteriales* genera *Nitrosomonas* and *Nitrospira* (Siripong and Rittmann  
71 2007, Wu et al. 2019) and NOB within the genus *Nitrospira* (Juretschko et al. 1998, Wu et al.  
72 2019) and more recently *Nitrotoga* (Saunders et al. 2016) are thought to be dominant nitrifiers in  
73 wastewater treatment systems. However, the discovery of complete ammonia oxidizing (i.e.,  
74 comammox) bacteria (Daims et al. 2015, Pinto et al. 2015, van Kessel et al. 2015) has added new  
75 complexity to nitrogen biotransformation in wastewater systems. For instance, comammox  
76 bacteria can completely oxidize ammonia to nitrate and may compete with canonical AOB and  
77 NOB, as well as anaerobic ammonia oxidizing (anammox) bacteria in partial nitrification-anammox  
78 (PNA) systems, also known as deammonification systems. The potential competition for ammonia  
79 and possibly nitrite among comammox bacteria and other nitrifiers could have implications for  
80 process design and operation not only in wastewater treatment but also across other ecosystems.

81  
82 Comammox bacteria have been detected in geothermal springs (Daims et al. 2015), aquaculture  
83 systems (van Kessel et al. 2015), drinking water (Pinto et al. 2015, Tatari et al. 2017, Wang et al.  
84 2017), rapid gravity sand filters treating groundwater (Fowler et al. 2018, Palomo et al. 2016),  
85 soils (Hu and He 2017, Orellana et al. 2018), as well as a range of wastewater treatment bioreactors  
86 (Annavaiahala et al. 2018, Camejo et al. 2017, Chao et al. 2016, Fan et al. 2017, Gonzalez-Martinez  
87 et al. 2016, Pjevac et al. 2017, Roots et al. 2019, Spasov et al. 2019, Wang et al. 2018, Xia et al.  
88 2018). The key to evaluating the impact of comammox bacteria on wastewater process operations  
89 is to understand the impact of key process variables on whether comammox prevalence and  
90 abundance and in turn how this impacts overall activity and function of the engineered system.  
91 This can then help delineate laboratory-, pilot-, or even full-scale experiments to probe competitive  
92 dynamics between comammox bacteria and other nitrifiers in scenarios that are relevant from a  
93 process operations perspective. To address this issue, the current study presents a systematic year-

94 long evaluation of nitrifying populations, including comammox bacteria, in full-scale wastewater  
95 treatment plants to provide a baseline of process configurations, operations, and environmental  
96 conditions under which comammox bacteria might be important.

97

98 All detected comammox bacteria belong to genus *Nitrospira* (lineage II) and exhibit close  
99 phylogenetic relatedness to canonical *Nitrospira*-NOB. Recent work suggests that the capacity to  
100 oxidize ammonia via the ammonia monooxygenase (AMO) and hydroxylamine dehydrogenase  
101 (HAO) enzymes may have been acquired by comammox *Nitrospira* via horizontal gene transfer  
102 (Palomo et al. 2018). Nonetheless, the close phylogenetic affiliation of comammox bacteria with  
103 canonical NOB represents a major challenge with their detection and quantitation. Specifically,  
104 the 16S rRNA gene and subunits A (*nxrA*) and B (*nxrB*) of the nitrite oxidoreductase (NXR) genes  
105 cannot distinguish between comammox bacteria from canonical NOB within the genus *Nitrospira*.  
106 One alternative to identify and obtain relative abundance of comammox bacteria within a complex  
107 nitrifying consortium involves the use of shotgun DNA sequencing (i.e., metagenomics). This has  
108 been employed by several studies (Annavaajhala et al. 2018, Camejo et al. 2017, Chao et al. 2016,  
109 Fan et al. 2017, Gonzalez-Martinez et al. 2016, Pinto et al. 2015, Roots et al. 2019, Spasov et al.  
110 2019, Xia et al. 2018) to demonstrate that comammox bacterial presence in wastewater systems is  
111 primarily dominated by clade A comammox bacteria closely related to *Ca Nitrospira nitrosa*.  
112 While metagenomics provides a snapshot overview, it is not ideally suited for high-throughput  
113 profiling of large number of samples particularly for microbial groups that are typically low-to-  
114 medium abundance (e.g., nitrifiers) due to sequencing cost and sequencing depth issues. To this  
115 end, the ammonia monooxygenase (*amo*) gene sequences provide a convenient approach for  
116 detection and quantitation. Specifically, both the subunit's A (*amoA*) and B (*amoB*) of the ammonia  
117 monooxygenase genes form distinct clusters from other known AOB and AOA. This sequence  
118 divergence has been used to develop primer sets targeting the *amoA* gene of clade A and clade B  
119 comammox bacteria separately (Pjevac et al. 2017) and together (Bartelme et al. 2017, Fowler et  
120 al. 2018, Wang et al. 2018). A consistent challenge with these primers is the formation of  
121 unspecific products and our experience in the study suggests that they are also unable to capture  
122 comammox bacteria detected via metagenomics (see results section). Alternatively, (Beach and  
123 Noguera 2019) proposed the use of species specific primers that target comammox bacterial *amoA*  
124 gene depending on the process of interest. For instance, they proposed that since *Ca Nitrospira*

125 nitrosa are dominant in low energy wastewater treatment systems, utilizing primers that capture  
126 *Ca Nitrospira nitrosa* would be ideal. While this circumvents the challenge of unspecific product  
127 formation, a species-specific approach eliminates the possibility of detecting other closely related  
128 comammox bacteria. In this study, we used a metagenomic approach to recover *amoA* and *amoB*  
129 genes from several full-scale nitrogen removal systems and use them in combination with  
130 previously published gene sequences to design and validate clade level primers for the *amoB* gene  
131 of clade A comammox bacteria; this is to our knowledge the primary comammox clade of  
132 relevance of wastewater treatment systems.

133  
134 The overall objectives of this study were (1) to identify nitrogen removal process configurations  
135 for wastewater treatment where comammox bacteria are likely to be relevant, (2) develop a qPCR  
136 assay for quantitation of comammox bacteria in complex nitrifying communities, and (3) perform  
137 a temporal survey across a range of process configurations to determine the influence of  
138 environmental and variable process operation conditions on the abundance of nitrifying  
139 populations inclusive of comammox bacteria. This was accomplished through year-long  
140 quantitative tracking of nitrifying populations in fourteen nitrogen removal systems with varying  
141 process configuration using genome resolved metagenomics and qPCR combined with appropriate  
142 statistical analyses.

143

## 144 **2.0 Materials and Methods**

### 145 **2.1 Sampling sites, sample processing, and data collection.**

146 Samples were collected on a monthly basis from June 2017 to June 2018 at fourteen nitrogen  
147 removal systems which included seven full-scale suspended growth nitrification-denitrification  
148 (ND) systems, one full-scale integrated fixed film activated sludge (IFAS) ND system, two full-  
149 scale simultaneous ND (SND) systems, one full-scale suspended growth side stream PNA system,  
150 and two full-scale IFAS PNA systems. Table 1 provides an overview of the nitrogen removal  
151 systems sampled in this study. Sample collection and processing were conducted according to the  
152 MIDAS field guide (McIlroy et al. 2015). Specifically, samples were collected from the nitrifying  
153 bioreactors by operational personnel at each of the wastewater utilities and 100 ml of sample was  
154 shipped overnight in coolers with icepacks to Northeastern University (NU). Immediately upon  
155 arrival to NU, the samples were homogenized using the Hei-TORQUE Value 400 (Heidolph, Cat.

156 No. 036093070) in a 30-mL glass/Teflon tissue grinder (DWK Life Sciences Wheaton, Cat. No.  
 157 357984) for 1 minute (2nd gear, speed 9, 10 times from top to bottom of the glass tissue grinder)  
 158 following the MIDAS protocol, and four 1 mL homogenized aliquots per sample were transferred  
 159 to Lysing Matrix E tubes (MP Biomedical, Cat. No. 6914100). Samples were centrifuged at  
 160 10,000g for 5 minutes and the supernatant was discarded and biomass pellet was stored at -80°C  
 161 until DNA extraction. Further, ~20 mg of media attached biomass samples from the IFAS system  
 162 were also stored in Lysing Matrix E tubes at -80°C. In addition, the utilities provided data on pH,  
 163 temperature, ammonia, nitrite, nitrate, chemical oxygen demand (COD), biological oxygen  
 164 demand (BOD), total suspended solids (TSS), volatile suspended solids (VSS), mixed liquor TSS  
 165 (MLSS) and mixed liquor VSS (MLVSS) from the influent, nitrification reactor, and effluent for  
 166 each sampling time point, as well as hydraulic retention time (HRT), solids retention time (SRT)  
 167 and dissolved oxygen (DO) data from the nitrification reactors.

168

169 **Table 1:** Overview of sampling locations, sampling scheme used in this manuscript, process type and sub-type,  
 170 operational scale and sampling time-frame for this study.

| Site code | Process type     | Process sub-type         | Treatment stream | Sampling Start (mm/yy) | Sampling End (mm/yy) |
|-----------|------------------|--------------------------|------------------|------------------------|----------------------|
| NEU       | ND <sup>1</sup>  | Four/five stage          | Mainstream       | 06/17                  | 06/18                |
| DUR       | PNA <sup>2</sup> | Anitamox                 | Sidestream       | 06/17                  | 06/18                |
| YAN       | SND <sup>3</sup> | ORP control <sup>a</sup> | Mainstream       | 11/17                  | 05/18                |
| GRE       | ND <sup>1</sup>  | SBR <sup>b</sup>         | Mainstream       | 06/17                  | 06/18                |
| DCWM      | ND <sup>1</sup>  | Five stage               | Mainstream       | 06/17                  | 06/18                |
| KIN       | ND <sup>1</sup>  | MBR/MLE <sup>c</sup>     | Mainstream       | 06/17                  | 06/18                |
| WIL       | ND <sup>1</sup>  | Five stage               | Mainstream       | 06/17                  | 06/18                |
| JAMM      | ND <sup>1</sup>  | IFAS <sup>d</sup>        | Mainstream       | 06/17                  | 06/18                |
| JAMS      | PNA <sup>2</sup> | Anitamox                 | Sidestream       | 06/17                  | 06/18                |
| YORM      | ND <sup>1</sup>  | Conventional             | Mainstream       | 06/17                  | 06/18                |
| YORS      | PNA <sup>2</sup> | DEMON                    | Sidestream       | 06/17                  | 06/18                |
| BOA       | ND <sup>1</sup>  | High MLSS                | Mainstream       | 06/17                  | 06/18                |
| NAN       | SND <sup>3</sup> | Five stage               | Mainstream       | 06/17                  | 06/18                |
| ARM       | ND <sup>1</sup>  | Five stage               | Mainstream       | 06/17                  | 06/18                |

171 <sup>1</sup>Nitrification-denitrification, <sup>2</sup>Partial nitrification-anammox, <sup>3</sup>Simultaneous nitrification-denitrification, <sup>a</sup>Oxidative-  
 172 Reduction Potential Control, <sup>b</sup>Sequencing batch reactor, <sup>c</sup>Membrane bioreactor/Modified Ludzack-Ettinger, <sup>d</sup>Integrated  
 173 Fixed-film Activated Sludge

174

175

176

## 177 **2.2 DNA extraction.**

178 Samples were subject to DNA extraction using the DNAeasy PowerSoil kit (Qiagen, Inc., Cat.  
179 No.12888) with automated extraction instrument QIAcube (Qiagen, Inc., Cat. No. 9002160)  
180 following manufacturer instructions with some modifications in the sample preparation step.  
181 Briefly, the lysing buffer from the PowerBead Tubes provided in the DNAeasy PowerSoil kit was  
182 transferred to the lysing matrix tubes containing the samples and 60  $\mu$ L of Solution C1 from the  
183 kit was added to each sample. To complete cell lysis, bead-beating was performed using a  
184 FastPrep-24 instrument (MP Bio, Cat. No. 116005500) four times for 40 seconds each (McIlroy  
185 et al. 2015). Between each 40 second bead beating interval, samples were kept on ice for 2 min to  
186 prevent excess heating. Samples were centrifuged at 10,000g for 30 seconds and the supernatant  
187 was further purified using the QIAcube Protocol Sheet for the DNeasy PowerSoil Kit. Ten samples  
188 and two blanks (only reagents) were extracted for each DNA extraction run. Extracted DNA was  
189 quantified using Qubit instrument with Qubit dsDNA Broad Range Assay (ThermoFisher  
190 Scientific, Cat. No. Q32850) and a subset of samples were randomly selected for analysis using  
191 1% agarose gel electrophoresis to visualize DNA shearing. Extracted DNA concentrations ranged  
192 from 2 to 254 ng/ $\mu$ L. DNA extracts were stored at -80°C until further analysis.

193

## 194 **2.3 Metagenomic sequencing and data analyses.**

195 One sample from each system was selected for metagenomic sequencing based on qPCR estimates  
196 of AOB and *Nitrospira* (see qPCR details in section 2.4). Specifically, samples with high  
197 *Nitrospira*:AOB ratios were selected for metagenomic sequencing under the assumption that these  
198 samples were likely to consist of comammox *Nitrospira* bacteria. For systems that included  
199 distinct suspended and attached growth phase (e.g., IFAS system from JAMM and PNA systems  
200 from JAMS and DUR), one sample each for the attached and suspended phase were included in  
201 the sequencing run resulting in a total of 18 metagenomes. Extracted DNA was shipped frozen to  
202 the Roy J. Carver Biotechnology Center at University of Illinois Urbana-Champaign Sequencing  
203 Core for sequencing. The DNA extracts were subject to PCR-free library preparation using Hyper  
204 Library construction kit from Kapa Biosystems and subsequently sequenced on 300 cycle run  
205 (2x150nt reads) on two lanes of Illumina HiSeq 4000. This resulted in a total of 1.35 billion paired-  
206 end reads. Raw data for these 18 metagenomes was deposited in NCBI with bioproject number  
207 PRJNA552823. The reads were subject to adaptor removal and quality trimming using



208 Trimmomatic (Bolger et al. 2014) which included adaptor removal, clipping of the first and last  
209 three bases, trimming of sequences where four-bp sliding window quality threshold was below  
210 Q20, and discarding of all trimmed sequences less than 75 bp in length. This resulted in a total of  
211 1.03 billion paired end reads which were analyzed using a few different approaches (see below).

212

### 213 **2.3.1 Reference genomes based annotation.**

214 A total of 53 publicly available Genomes/genome assemblies for nitrifying organisms were  
215 downloaded from NCBI (RefSeq version 86) (Table S1). This included genome assemblies for 12  
216 AOA, five anammox bacteria, 17 AOB, 10 comammox bacteria, and nine NOB. Reads from all  
217 samples were competitively mapped to the reference genomes using bwa (Li and Durbin 2010)  
218 followed by extraction of properly paired mapped reads (samtools view -f2) using SAMtools (Li  
219 et al. 2009). The extracted reads were then again competitively aligned against reference genomes  
220 using BLAST (Altschul et al. 1990) with a criterion of 90% sequence identity and 90% read  
221 coverage. The reads per kilobase million (RPKM) metric was used as a measure of the reference  
222 genome relative abundance in each sample and was estimated by dividing the number of reads  
223 aligning to reference genome at aforementioned criteria with the number of kilobases in each  
224 reference genome and the millions of reads per sample.

225

### 226 **2.3.2 SSU rRNA based community characterization.**

227 The paired end metagenomic reads were assembled using MATAM (Pericard et al. 2018) with the  
228 SILVA SSU rRNA (Release 132) database (Quast et al. 2013) as the reference for assembly of the  
229 16S rRNA genes with a minimum 16S rRNA gene length threshold of 500 bp. The assembled 16S  
230 rRNA genes were classified against the RDP database (Cole et al. 2014) using Naïve Bayesian  
231 classifier approach (Wang et al. 2007). The relative abundance of each 16S rRNA gene was  
232 estimated by dividing the number of reads mapping to each MATAM assembled 16S rRNA gene  
233 with the total number of reads mapping to all assembled 16S rRNA genes per sample.

234

### 235 **2.3.3 Gene-centric de novo assembly.**

236 The paired end reads from each sample assembled into contigs using metaSpades (Nurk et al.  
237 2017); where two sets of reads were available from attached and suspended phase from same  
238 bioreactor (i.e., JAMM, JAMS, DUR) or from two parallel operated bioreactors (GRE), these were

239 co-assembled. MetaSpades assembly/co-assembly was carried out with kmers 21, 33, 55, 77, 99,  
240 and 127. The assembled contigs were filtered to remove all contigs smaller than 500 bp and subject  
241 to gene calling using prodigal (Hyatt et al. 2010) and annotation against the KEGG database  
242 (Kanehisa et al. 2016) using DIAMOND (Buchfink et al. 2015). Genes identified as encoding for  
243 *amoA* (KO:K10944), *amoB* (KO:K10945), and *nxrA* (KO:K00370) were extracted for further  
244 analyses. An analysis of genes assembled using *de novo* assembly approach for the complete  
245 metagenome revealed that several of the identified genes were highly fragmented. To circumvent  
246 this limitation, gene-centric *de novo* assembly was used. Specifically, paired end reads were  
247 mapped to a curated amino acid database of *amoA*, *amoB*, and *nxrA* genes using DIAMOND  
248 (Buchfink et al. 2015). The mapped reads were then assembled into contigs metaSpades (Nurk et  
249 al. 2017), followed by gene calling using prodigal (Hyatt et al. 2010) and annotation against the  
250 KEGG database (Kanehisa et al. 2016). The *amoA*, *amoB*, and *nxrA* genes identified using the  
251 complete and gene-targeted *de novo* assembly approach were combined, de-duplicated, and further  
252 curated by evaluating phylogenetic placement of assembled genes. Specifically, reference  
253 alignments for *amoA*, *amoB*, and *nxrA* genes were created by extracting corresponding genes from  
254 the reference assemblies and aligning with MUSCLE (Edgar 2004) followed by construction of a  
255 reference tree for each gene using RAxML (Stamatakis 2014). The *amoA*, *amoB*, and *nxrA* genes  
256 were placed on the gene-specific reference tree using pplacer (Matsen et al. 2010). Annotated  
257 genes that did not conform to known phylogeny of *amoA* and *amoB* for AOB, AOA, and  
258 comammox bacteria and *nxrA* genes for NOB and comammox bacteria were discarded. Finally,  
259 the relative abundance of the curated genes in each sample was estimated using the RPKM metric.  
260 Specifically, the sum of reads mapping to contig containing gene of interest per sample were  
261 divided by number of kilobases in for each contig and the millions of reads per sample.

262

### 263 **2.3.4 Recovery, phylogenomic placement, and annotation of Nitrospira metagenome** 264 **assembled genomes.**

265 Assembled contigs from nine metagenomes corresponding to seven nitrogen removal systems  
266 where comammox bacteria were detected (i.e., DCWM, GRE1/GRE2, JAMM/JAMMSM, KIN,  
267 NEU, WIL, and YAN) were pooled. Reads from each metagenome were mapped to all contigs  
268 with bowtie2 (default parameters, version 2.1.0) (Langmead and Salzberg 2012) prior to binning  
269 with MetaBAT2 (-m 2000, version 2.12.1) (Kang et al. 2015). The completion and redundancy of

270 the resulting bins were estimated with CheckM (lineage\_wf, version 1.0.12) (Parks et al. 2015).  
271 Reads mapping to bins  $\geq 50\%$  complete were extracted and used to re-assemble the bin with  
272 Unicycler (default parameters, version 0.4.7) (Bankevich et al. 2012, Li et al. 2009, Wick et al.  
273 2017). The quality and taxonomy of re-assembled bins were evaluated with CheckM (Parks et al.  
274 2015) and the Genome Taxonomy Database Toolkit (GTDB-Tk 0.2.2, database release r86 v3)  
275 (Parks et al. 2018). Bins greater than 70% complete and classified as *Nitrospira* by GTDB-Tk were  
276 retained for manual refinement with Anvi'o (Eren et al. 2015). Following refinement, the quality  
277 and taxonomy of the bins were re-assessed with CheckM (Parks et al. 2015) and the Genome  
278 Taxonomy Database Toolkit (Parks et al. 2018), selecting metagenome assembled genomes  
279 (MAGs) with completeness and redundancy estimates of  $\geq 70\%$  and  $\leq 10\%$ , respectively. Open  
280 reading frames (ORFs) were predicted using Prodigal (Hyatt et al. 2010) v2.6.3 for all *Nitrospira*  
281 MAGs recovered from this study (n=10). KEGG orthologies (KO) were assigned to predicted  
282 ORF's in these 10 genomes against 10,108 HMM models of prokaryota in KEGG(Kanehisa et al.  
283 2016) database v90.1 using kofamskan (Aramaki et al. 2019). To investigate the phylogeny of  
284 these 10 *Nitrospira* MAGs recovered from this study, 32 previously publicly available *Nitrospira*  
285 genomes were downloaded from Genbank (Table S2) (Poghosyan et al. 2019) and used as  
286 reference genomes for phylogenetic tree reconstruction. Phylogenomic tree reconstruction was  
287 conducted by Anvi'o (Eren et al. 2015) v5.5. ORFs were predicted for aforementioned 32 reference  
288 genomes and 10 MAGs from this study using Prodigal (version 2.6.3) (Hyatt et al. 2010) and  
289 then searched against a collection of HMM models summarized by Campbell et al. (Campbell et  
290 al. 2011) using hmmscan (version 3.2.1) (Eddy 2011) including 48 ribosomal proteins. Only  
291 genomes containing more than genes encoding for 40 of the 48 ribosomal proteins were included  
292 in downstream phylogenomic analyses. Alignments for each gene were conducted using muscle  
293 (Edgar 2004), alignments were concatenated, and finally phylogenomic tree was constructed using  
294 FastTree (version 2.1.7) (Price et al. 2010).

295

#### 296 **2.4 Quantitative PCR for total bacteria and nitrifying populations and design of primers** 297 **targeting *amoB* gene of clade A comammox bacteria.**

298 PCR thermocycling and reaction mix conditions of previously published primer sets for qPCR-  
299 based quantification of 16S rRNA gene of total bacteria (Caporaso et al. 2011), AOB (Hermansson  
300 and Lindgren 2001) and *Nitrospira* (Graham et al. 2007) and ammonia monooxygenase subunit A

301 (*amoA*) gene for AOB (Rotthauwe et al. 1997) are shown in Table 2. Further, qPCR assays  
302 targeting the *amoA* gene of comammox bacteria were conducted using previously published primer  
303 sets (Fowler et al. 2018, Pjevac et al. 2017) and additional comammox *amoA* primer sets designed  
304 a part of this study (Table 2). However, these assays either resulted in unspecific product formation  
305 and non-detection of comammox bacteria in samples where metagenomic analyses indicated  
306 presence of comammox bacteria. As a result, new primer sets targeting the *amoB* gene of clade A  
307 comammox bacteria (only clade A comammox bacteria were detected via metagenomic analyses  
308 in this study) were designed. To do this, the *amoB* genes assembled from the metagenomic data  
309 were combined with *amoB* gene sequences from previous studies (Daims et al. 2015, Palomo et  
310 al. 2016, Pinto et al. 2015, van Kessel et al. 2015) and two primer sets were designed (Table 2).  
311 These new set of primers were tested with samples that were positive and negative for comammox  
312 bacteria, along with DNA extracts from *Ca Nitrospira inopinata* as positive control involving  
313 variation in annealing temperature, primer concentration, and template concentration.

314  
315 The qPCR assays were performed on a QuantStudio 3 Real-Time PCR System (ThermoFisher  
316 Scientific, Cat. No. A28567) in 20  $\mu$ L reaction volume including: 10  $\mu$ L Luna Universal qPCR  
317 Master Mix (New England Biolabs, Inc., Cat. No. NC1276266), primers listed in Table 2, 5  $\mu$ L of  
318 10 times diluted DNA template and the required volume of DNase/RNase-Free water (Fisher  
319 Scientific, Cat. No. 10977015) to reach 20  $\mu$ L reaction. Reactions were prepared by the epMotion  
320 M5073 liquid handling system (Eppendorf, Cat. No. 5073000205D) in triplicate. The cycling  
321 conditions were as follows: initial denaturing at 95°C for 1 min followed by 40 cycles of denaturing  
322 at 95°C for 15 s, annealing temperatures and times listed in Table 2, and extension at 72°C for 1  
323 min. Melting curve analyses was performed at 95°C for 15 s, 60°C for 1 min, and 95°C for 15 s. A  
324 negative control (NTC) and a standard curve ranging from  $10^3$ - $10^9$  copies of 16S rRNA gene of  
325 *Nitrosomonas europaea* for total bacteria assay and  $10^2$  –  $10^8$  copies of 16S rRNA genes for  
326 *Nitrosomonas europaea* and *Ca Nitrospira inopinata* for the AOB and *Nitrospira* assays,  
327 respectively and  $10^2$  –  $10^8$  copies for *amoA* of *Nitrosomonas europaea* and *Ca Nitrospira inopinata*  
328 for the AOB and comammox assays, respectively and *amoB* gene of *Ca Nitrospira inopinata* for  
329 the comammox assays were included in the qPCR analysis.

330

331

332 **2.5 Statistical analyses.**

333 Statistically significant differences in the abundance of nitrifying organisms between nitrogen  
334 removal systems was evaluated using the non-parametric Kruskal-Wallis or Wilcoxon rank sum  
335 test in R as appropriate (RCoreTeam 2014). Correlations between any two variables were  
336 determined using Spearman rank correlations and BIOENV analysis within the R package "vegan"  
337 to identify process and environmental variables that demonstrate significant correlation with  
338 changes in nitrifier population abundances. All statistical tests and figure generation (Wickham  
339 2009) were performed in R (RCoreTeam 2014).

340 **Table 2:** A summary of qPCR primers used and tested as part of this study (\*equimolar proportions of forward and/or reverse primers if multiple primers are used).

| Primer set             | Assay              | Gene        | Forward primer                                                                                                             | Reverse primer                                                                                                       | Product size (bp) | Annealing Temp (°C)/Time (sec) | Reference                      |
|------------------------|--------------------|-------------|----------------------------------------------------------------------------------------------------------------------------|----------------------------------------------------------------------------------------------------------------------|-------------------|--------------------------------|--------------------------------|
| F515 - R806            | Total bacteria     | 16S rRNA    | GTGCCAGCMGCCGCGGTAA                                                                                                        | GGACTACHVGGGTWTCTAAT                                                                                                 | 291               | 50/15                          | (Caporaso et al. 2011)         |
| CTO189FA/B/C* - RT1R   | AOB                | 16S rRNA    | GGAGRAAAGCAGGGGATCG<br>GGAGGAAAGTAGGGGATCG                                                                                 | CGTCCTCTCAGACCARCTACTG                                                                                               | 116               | 57/30                          | (Hermansson and Lindgren 2001) |
| amoA1F - 2R            | AOB                | <i>amoA</i> | GGGG TTTCTACTGGTGGT                                                                                                        | CCCCTCKGSAAAGCCTTCTTC                                                                                                | 491               | 54/30                          | (Rotthauwe et al. 1997)        |
| Nspra675F - 746R       | Nitrospira         | 16S rRNA    | GCGGTGAAATGCGTAGAKATCG                                                                                                     | TCAGCGTCAGRWAYGTTCCAGAG                                                                                              | 93                | 58/30                          | (Graham et al. 2007)           |
| comaA-D 244F - 659R    | Comammox (clade A) | <i>amoA</i> | TAYAAVTGGGTSAAYTA                                                                                                          | ARATCATSGTGCTRTG                                                                                                     | 415               | 52/45                          | (Pjevac et al. 2017)           |
| comaB-D 244F - 659R    | Comammox (clade B) | <i>amoA</i> | TAYTTCTGGACRTTYTA                                                                                                          | ARATCCARACDGTGTG                                                                                                     | 415               | 52/45                          | (Pjevac et al. 2017)           |
| comaA 244F* - 659R*    | Comammox (clade A) | <i>amoA</i> | TACAACTGGGTGAACTA<br>TAACTGGGTGAACTA<br>TACAATTGGGTGAACTA<br>TACAACTGGGTCAACTA<br>TACAACTGGGTCAATTA<br>TAACTGGGTCAATTA     | AGATCATGGTGCTATG<br>AAATCATGGTGCTATG<br>AGATCATGGTGCTGTG<br>AAATCATGGTGCTGTG<br>AGATCATCGTGCTGTG<br>AAATCATCGTGCTGTG | 415               | 52/45                          | (Pjevac et al. 2017)           |
| comaB 244F* - 659R*    | Comammox (clade B) | <i>amoA</i> | TAYTTCTGGACGTTCTA<br>TAYTTCTGGACATTCTA<br>TACTTCTGGACTTTCTA<br>TAYTTCTGGACGTTTTA<br>TAYTTCTGGACATTTTA<br>TACTTCTGGACCTTCTA | ARATCCAGACGGTGTG<br>ARATCCAAACGGTGTG<br>ARATCCAGACAGTGTG<br>ARATCCAAACAGTGTG<br>AGATCCAGACTGTGTG<br>AGATCCAAACAGTGTG | 415               | 52/45                          | (Pjevac et al. 2017)           |
| Ntspa-amoA 162F - 359R | Comammox           | <i>amoA</i> | GGATTTCTGGNTSGATTGGA                                                                                                       | WAGTTNGACCACCASTACCA                                                                                                 | 197               | 52/45                          | (Fowler et al. 2018)           |
| comaA - F/R            | Comammox (clade A) | <i>amoA</i> | CARTGGTGGCCBATCGT                                                                                                          | TNGACCACCACCACCA                                                                                                     | 170               | 52/45                          | This study                     |
| comaB - F/R            | Comammox (clade B) | <i>amoA</i> | GGNGACTGGGAYTTCTGG                                                                                                         | GCCCACCARTACCARGC                                                                                                    | 190               | 52/45                          | This study                     |
| Cmx_amoB_1             | Comammox (clade A) | <i>amoB</i> | TGACSATGGATAABGAGG                                                                                                         | TCCGGATCGTGRAGAATGTC<br>TCTGGATCGTGRAGAATGTC                                                                         | 114               | 52/45                          | This study                     |
| Cmx_amoB_2             | Comammox (clade A) | <i>amoB</i> | TGGTAYGAYACNGAATGGG                                                                                                        | CCCGTGATRTCCATCCA                                                                                                    | 337               | 52/45                          | This study                     |

### 342 3.0 Results and Discussion

#### 343 3.1 Overview of nitrogen removal systems included in this study.

344 As part of this study, we sampled fourteen full-scale nitrogen removal systems of varying process  
 345 configurations. Specifically, we sampled nine nitrification-denitrification (ND), two simultaneous  
 346 nitrification-denitrification (SND) mainstream systems, and three partial nitrification-anammox  
 347 (PNA) sidestream systems with diverse process subtypes (Table 1). The process sub-types ranged  
 348 from multi-stage suspended growth systems with secondary clarification to sequencing batch  
 349 reactors (SBRs) ones to membrane bioreactors (KIN) to systems with significant attached growth  
 350 components (e.g., DUR, JAMM, JAMS). The typical process parameters for each of these systems  
 351 is shown in Figure 1. All nitrogen removal systems included in this study performed normally  
 352 during this study with no significant and sustained process upset.

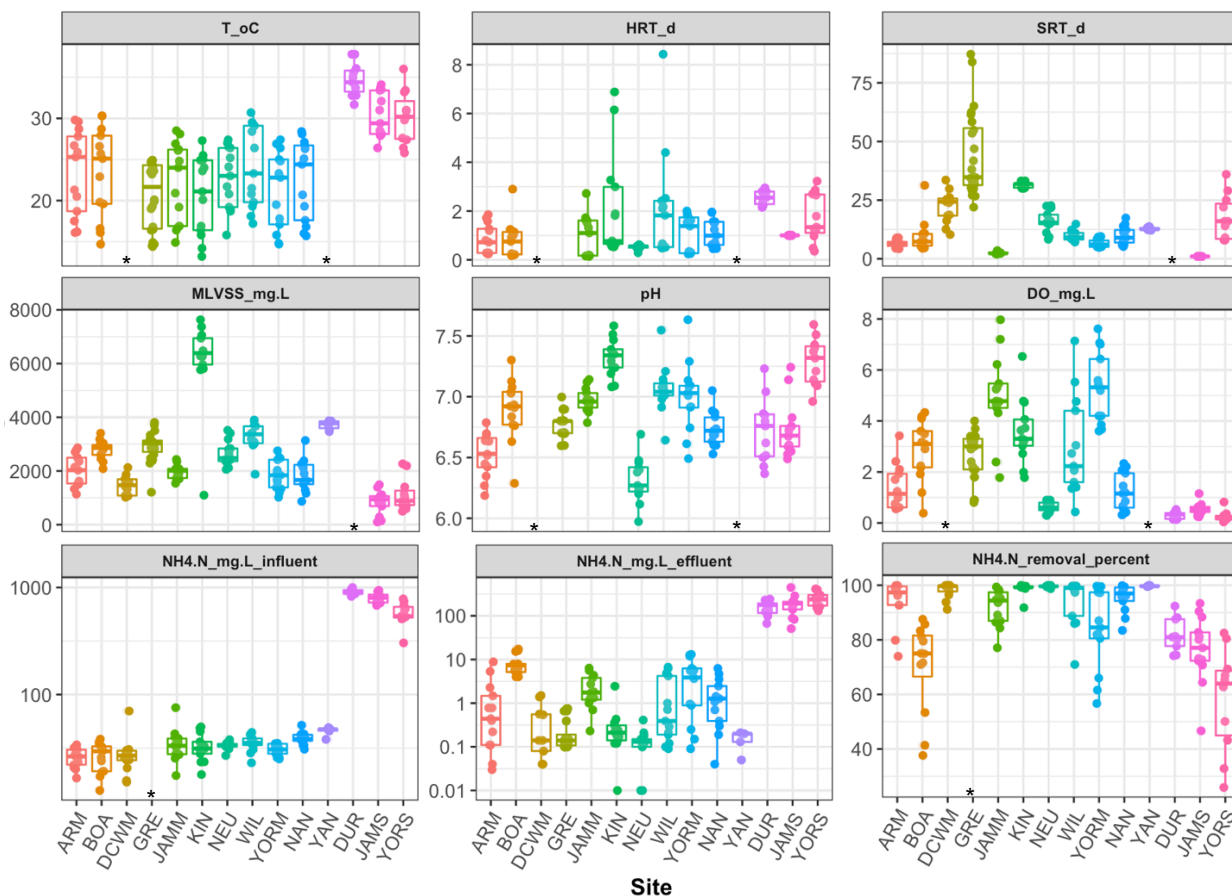

**Figure 1:** Overview of key process parameters and performance metrics monitored as part of this study for 14 nitrogen removal systems. Column indicated with "\*" indicates lack of relevant process data for the respective nitrogen removal system.

### 353 **3.2 Identification of nitrifying populations using reference genome mapping and 16S rRNA** 354 **gene assembly.**

355 Mapping of reads to reference genomes indicated that *Nitrospira*-like bacteria were dominant  
356 members of the nitrifying communities in all ND and SND systems followed by *Nitrosomonas*-  
357 like bacteria, with no or very low detection of AOA (Figure 2A). Nearly all detected AOB  
358 belonged to the genus *Nitrosomonas* with low levels of detection of AOB within the genera  
359 *Nitrosococcus* and *Nitrospira* in two systems (i.e., ARM and BOA). Metagenomic reads mapped  
360 to comammox references genomes within the genus *Nitrospira* for samples from six ND and one  
361 SND system, with abundances higher than canonical *Nitrospira*-NOB for three ND systems (i.e.,  
362 GRE, KIN, and NEU) and one SND system (i.e., YAN). Genera containing other canonical NOB,  
363 i.e. *Nitrotoga* and *Nitrobacter*, were detected in two ND and one SND system with *Nitrotoga* being  
364 the primary NOB in BOA. Mapping of metagenomic reads from PNA systems to reference  
365 genomes primarily resulted in the detection of anammox bacteria (genus: *Brocadia*) and AOB  
366 (genus: *Nitrosomonas*), with no detectable presence of *Nitrospira*. It is important to note that while  
367 metagenomic reference genome based approach may be useful for detection of organisms, its  
368 quantitative value is limited. This limitation likely emerges from the reliance of a reference  
369 database of genomes and the stringent criteria used for read mapping (i.e., 90% sequence identity  
370 between metagenomic read over 90% of the read length). Thus, it is possible that the significant  
371 over representation of *Nitrospira* in the metagenomic reference genome-based approach emerges  
372 from a high level of genomic similarity between *Nitrospira* in the samples and in the reference  
373 database and under representation of AOB emerges from a low level of genomic similarity between  
374 AOB in the samples and in the reference database. This is the most likely scenario because  
375 genomic similarity between organisms within the same genus can be as low as 75% (Jain et al.  
376 2018).

377  
378 In contrast, a subset of genes (particularly ribosomal genes) may be far more reliable for relative  
379 quantitation of microbial abundance within the larger community. Thus, we used MATAM to  
380 identify reads originating from the 16S rRNA gene within each metagenomic sample and  
381 subsequently assemble them and finally determine the relative abundance of each gene in the  
382 sample microbial community. The reference genome mapping results were largely consistent with  
383 classification of MATAM-assembled 16S rRNA genes (Figure 2B) with *Nitrospira*- and



384 *Nitrosomonas*-like bacteria dominant in ND and SND systems and *Brocadia*- and *Nitrosomonas*-  
385 like bacteria being dominant in PNA systems. Three of the 14 systems included in this study  
386 consisted of distinct suspended and attached growth phase, i.e., ND IFAS system (i.e., JAMM)  
387 and two side-stream PNA systems (DUR and JAMS). Relative abundances of *Nitrospira*- and  
388 *Nitrosomonas*-like bacteria were similar between the suspended and attached growth phase for  
389 JAMM while *Brocadia*-like bacteria were enriched in the attached growth phase for DUR and  
390 JAMS. The key differences between reference genome- and 16S rRNA gene analyses were for the  
391 PNA systems and one ND system (i.e., BOA). Specifically, *Nitrospira*-like bacteria were also  
392 detected in all PNA system included in this study using 16S rRNA gene analyses compared to  
393 reference mapping of metagenomics reads and while *Nitrolancea*-like bacteria were the primary  
394 nitrifying bacteria in BOA, 16S rRNA gene analyses suggested high abundance of *Brocadia*-like  
395 bacteria in KIN as well. The discrepancies between reference genome based analyses and 16S  
396 rRNA gene assembly based analyses may result from the limitation of the prior (as stated above),  
397 inefficient assembly of 16S rRNA genes due to highly conserved regions (Miller et al. 2011,  
398 Pericard et al. 2018), or a combination of both.

399

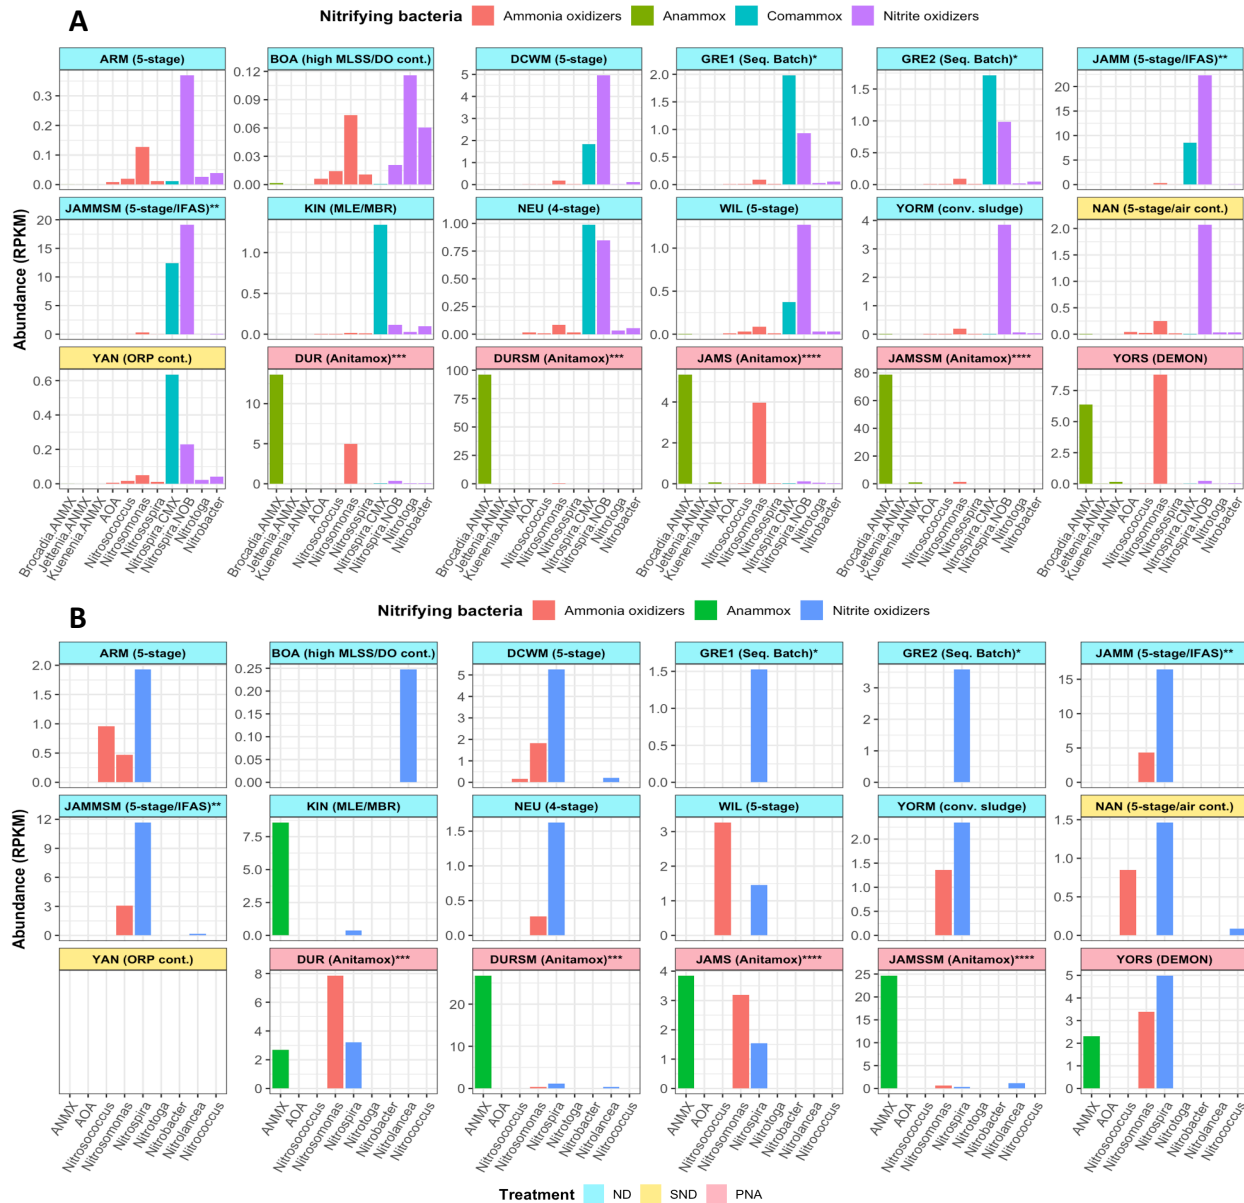

**Figure 2:** Relative abundance of nitrifying organisms in nitrogen removal systems based on (A) mapping of reads to reference genomes and (B) classification of MATAM assembled 16S rRNA genes. Bar colors indicate type of nitrifying organism detected (see color legend below each figure), while facet color indicates process type (i.e., red: PNA, Blue: ND, and Yellow: SND). GRE1/GRE2\* panels present abundance of nitrifying populations from two different reactors at the same treatment plant. JAMM/JAMMSM\*\*, DUR/DURSM\*\*\*, and JAMS/JAMSSM\*\*\*\* panels present abundance of nitrifying populations in the suspended phase and attached growth phase of the system, respectively.

400

401

402

### 403 **3.3 Functional gene based metagenomic identification of ammonia and nitrite oxidizing** 404 **bacteria.**

405 Mapping of reads to curated *amoA*, *amoB*, and *nxrA* genes, followed by gene-centric *de novo*  
406 assembly was used to detect and estimate the relative abundance of AOB, comammox bacteria,  
407 and NOB in the metagenomic datasets from the 14 systems. Subsequently, all assembled and  
408 annotated genes were placed on gene specific phylogenetic trees to eliminate potentially  
409 misannotated *amoA*, *amoB*, and *nxrA* genes. This analysis revealed that nearly all annotated AOB  
410 belonged to *Betaproteobacteriales* (Figure 3A) and contained representative sequences from ND,  
411 SND, and PNA systems, while *amoA* and *amoB* sequences from comammox bacteria were  
412 detected in DCWM, GRE, JAMM/JAMMSM, KIN, NEU, WIL, and YAN (Figure 3B). These  
413 results are qualitatively consistent (i.e., presence/absence of comammox bacteria) with those  
414 obtained by reference genome based analyses of comammox bacteria. The relative abundance of  
415 comammox bacteria was higher than AOB in JAMM/JAMMSM, while both were equally  
416 abundant two ND systems (i.e., GRE and NEU) and one SND system (i.e., YAN). In contrast,  
417 comammox were less abundant than AOB in DCWM and WIL; both of these are ND systems.  
418 Interestingly, no AOB were detected in KIN (an MBR/MLE system) with comammox being the  
419 only ammonia oxidizer. The results for KIN were consistent with that of reference genome based  
420 and 16S rRNA gene based analyses, where no AOB were detected. Further, the similarity in  
421 relative abundance of *amoA*, *amoB*, and *nxrA* genes indicates that all detected *Nitrospira* bacteria  
422 in this system are likely to be comammox bacteria. The non-detection of other AOB (e.g.,  
423 *Nitrosospira*, *Nitrosococcus*) and NOB (e.g., *Nitrotoga*) that were detected by reference genome  
424 based or 16S rRNA gene assembly based analyses could be due to challenges with *de novo*  
425 assembly genes from low abundance microorganisms (i.e., insufficient sequencing depth and thus  
426 low coverage).

427

428 A consistent aspect of systems with prevalent comammox populations was their high total solids  
429 retention time (SRT). For instance, KIN is an MBR system with an estimated SRT of ~30 days,  
430 DCWM is a ND system with a total SRT of ~30 days, and GRE is an SBR system with an SRT >  
431 30 day. While JAMM/JAMMSM (i.e., James River) has an SRT of 2.5 days for the suspended  
432 phase, this is an IFAS system with a significant attached growth component. This suggests that  
433 irrespective of the process configuration type (ND, SND) and/or mode of operation (continuous,

434 SBR, attached growth), the key similarity among comammox prevalent systems is their high SRT  
435 or presence of attached growth component (i.e., implicitly high SRT). This is consistent with  
436 thermodynamic and metabolic pathway modeling that suggests that comammox bacteria have a  
437 very low specific growth rates compared to AOB and NOB (Costa et al. 2006). For instance, recent  
438 literature suggests that comammox maximum specific growth rates are 3-10, 5-11, and 2 times  
439 lower than that of Nitrospira-NOB, AOB, and AOA (Kits et al. 2017, Lawson and Lückner 2018).  
440 While this explains the prevalence of comammox in long SRT system, it does not explain the  
441 absence of AOA in these systems. While AOA are highly prevalent in other ecosystems (i.e., soils,  
442 drinking water, marine environments) (Prosser and Nicol 2008), they are rarely detected in  
443 wastewater systems (Chao et al. 2016, Pjevac et al. 2017) including those in this project. It is  
444 plausible that the absence of AOA and presence of comammox may be explained by the difference  
445 in their affinity for ammonia, i.e., AOA with  $K_m(\text{NH}_3)$  ranging from 0.36 to 4.4  $\mu\text{M}$  compared  
446 with reported *Ca Nitrospira inopinata*  $K_m(\text{NH}_3)$  of 0.049  $\mu\text{M}$  (Kits et al. 2017, Lawson and Lückner  
447 2018).

448

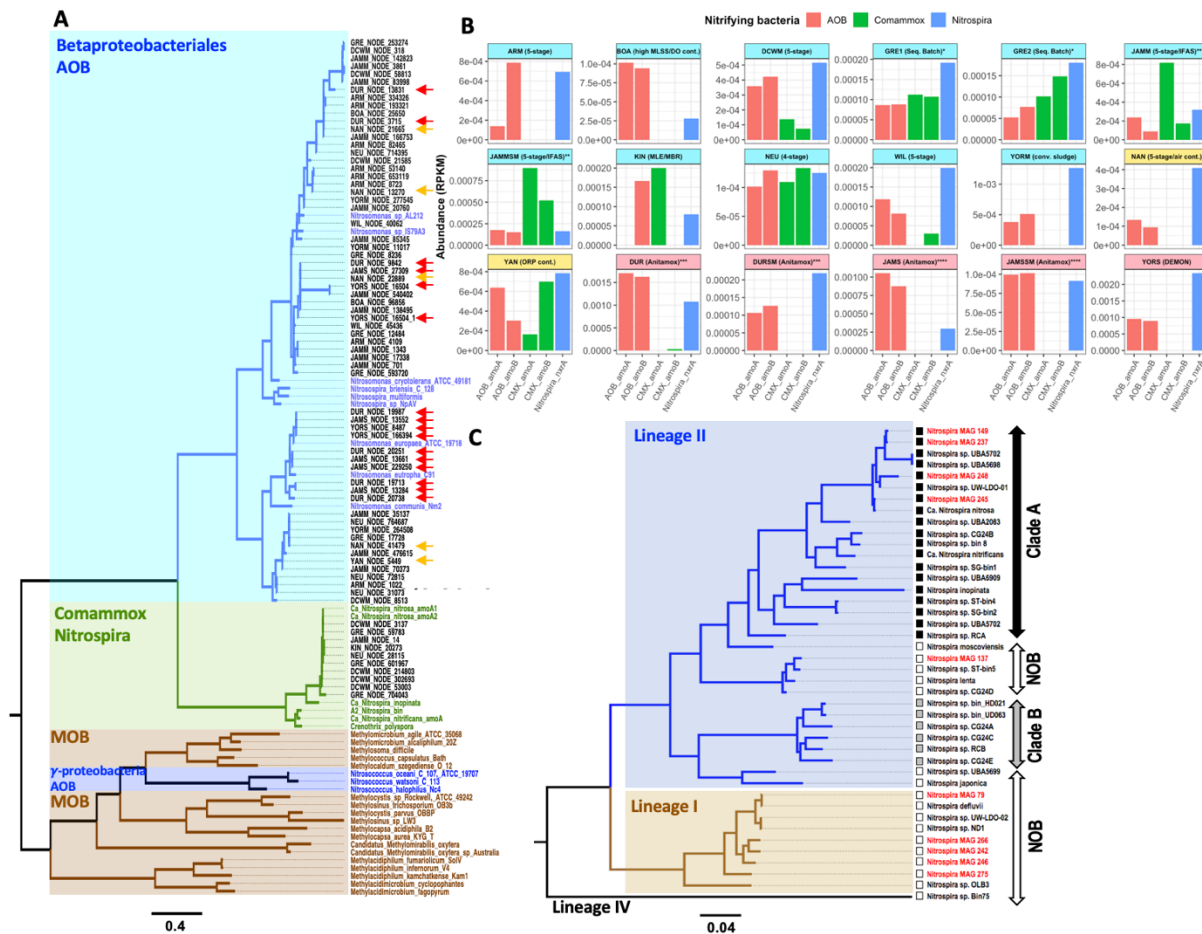

**Figure 3:** (A) Maximum likelihood phylogenetic tree of *amoA* genes recovered from gene centric *de novo* assembly along with reference *amoA* and *pmoA* gene sequences. Clades are colored by functional grouping and labels for reference sequences within each cluster are colored according to the functional group, while *amoA* gene sequences recovered from this study are shown in black labels. Red and orange arrows indicate *amoA* gene sequences recovered from PNA and SND systems respectively, while those recovered from ND systems are not annotated. *amoA* gene sequences from YAN and KIN are not shown in the phylogenetic tree due to recovery of short sequences not suitable for tree construction. (B) Abundance (RPKM) of *amoA*, *amoB* gene sequences of AOB and comammox bacteria, and *nxrA* gene sequences of Nitrospira are shown. (C) Phylogenetic placement of Nitrospira MAGs (red label) with 32 reference genomes (black label). Clade A (black squares), clade B (grey squares) comammox bacteria and canonical NOB (open squares).

449

450 All comammox based *amoA* and *amoB* gene sequences detected using metagenomic sequencing  
 451 closely clustered with *Ca Nitrospira nitrosa* and distinct from other clade A bacteria (e.g., *Ca*  
 452 *Nitrospira nitrificans*, *Ca Nitrospira inopinata*) (Figure 3B). Further, all Nitrospira MAG's  
 453 recovered from the genome binning process were associated with either lineage 1 or 2 *Nitrospira*  
 454 and included six canonical NOB and four clade A comammox. Genome statistics for the recovered  
 455 MAGs are shown in Table 3. Consistent with previously described clade A comammox bacteria,

456 all comammox MAGs contained some or all genes associated with both ammonia and nitrite  
 457 oxidation, except for *Nitrospira* MAG 248 which is likely due to lower completeness (i.e., 70%).  
 458 Similarly, these comammox MAG's contained genes involved in urea uptake and hydrolysis - a  
 459 feature shared with the other recovered canonical *Nitrospira* NOB MAGs. Further, similar to other  
 460 clade A comammox bacteria, the recovered comammox MAG's lacked ammonium transporter  
 461 (Amt) or any of formate dehydrogenase genes which are reported present in clade B comammox  
 462 as well as canonical NOB within lineage II *Nitrospira* (Poghosyan et al. 2019). Finally, similar to  
 463 previously reported clade A comammox bacteria, the comammox MAG's recovered in this study  
 464 also indicated presence of genes associated with group 3b [NiFe] hydrogenase.

465

466 **Table 3:** Statistics of the *Nitrospira* MAG's assembled in this study and their functional grouping.

| <b><i>Nitrospira</i> MAGs</b> | <b>79</b> | <b>137</b> | <b>149</b> | <b>237</b> | <b>242</b> | <b>245</b> | <b>246</b> | <b>248</b> | <b>266</b> | <b>275</b> |
|-------------------------------|-----------|------------|------------|------------|------------|------------|------------|------------|------------|------------|
| <i>Nitrospira</i> lineage     | 1         | 2          | 2          | 2          | 1          | 2          | 1          | 2          | 1          | 1          |
| Completeness (%)              | 94.94     | 87.92      | 75.23      | 93.3       | 89.09      | 82.17      | 84.94      | 70.99      | 71.75      | 97.67      |
| Redundancy (%)                | 1.36      | 9.15       | 1.14       | 3.86       | 2.36       | 4.6        | 4.09       | 2.12       | 1.75       | 1.36       |
| Genome size (Mbp)             | 3.49      | 4.07       | 3.08       | 4.54       | 4.02       | 3.8        | 3.78       | 2.59       | 1.88       | 3.91       |
| GC content                    | 59.14     | 58.05      | 54.87      | 54.83      | 58.41      | 54.64      | 58.36      | 54.86      | 58.42      | 58.79      |
| Number of contigs             | 136       | 410        | 229        | 48         | 114        | 203        | 98         | 412        | 179        | 54         |
| N50 of contigs                | 40833     | 25623      | 21078      | 171941     | 177531     | 34975      | 85503      | 8266       | 19532      | 794701     |
| genes                         | 3361      | 4115       | 3141       | 4498       | 3886       | 3779       | 3694       | 2693       | 1842       | 3753       |
| Protein coding genes          | 3322      | 4062       | 3113       | 4455       | 3845       | 3743       | 3653       | 2668       | 1821       | 3708       |
| rRNA                          | 0         | 1          | 1          | 3          | 0          | 0          | 0          | 0          | 0          | 0          |
| tRNA                          | 38        | 51         | 26         | 40         | 41         | 36         | 41         | 25         | 21         | 44         |
| Functional group              | NOB       | NOB        | CMX        | CMX        | NOB        | CMX        | NOB        | CMX        | NOB        | NOB        |

467

### 468 **3.4 Development of qPCR assay for quantitative detection of comammox bacteria.**

469 We used previously developed primer sets (Fowler et al. 2018, Pjevac et al. 2017) to quantify the  
 470 abundance of comammox bacteria in samples collected as part of the study (Table 2). Pjevac et al.  
 471 (2017) provided two different primer sets targeting the *amoA* gene both clade A and clade B  
 472 comammox bacteria; one primer set was the degenerate primer set while the other contained an  
 473 equimolar proportion of six forward and six reverse primers. In contrast, Fowler et al. (2017)  
 474 developed a single primer set targeting the *amoA* gene of both clade A and clade B comammox

475 bacteria. While both primer sets showed excellent PCR efficiency with DNA extracts from pure  
476 culture of *Ca Nitrospira inopinata*, efforts to PCR amplify the *amoA* gene from samples included  
477 in this study demonstrated either non-detection of comammox bacteria in the six systems with  
478 metagenomic evidence of their presence or unspecific product formation (Figure 4A, B). This was  
479 also consistent for *amoA* specific primers designed in this study (Table 2). The same issue was  
480 also highlighted by Beach and Noguera, (2019), who suggested the use of species primers for  
481 comammox detection based on the system of interest (i.e., wastewater, drinking water, etc). The  
482 comammox *amoA* primers were also tested against the comammox *amoA* genes recovered from  
483 the metagenomic sequencing data. This *in silico* analysis indicated that primer sets comaA-D  
484 (244f-659R), comaA (244F-659R), and comA-F/R matched recovered *amoA* genes, yet the issue  
485 with unspecific product amplification and non-detects in some samples were persistent despite  
486 additional efforts to optimize annealing temperatures, template concentration and PCR additives  
487 (i.e., DMSO, BSA, magnesium, etc). Therefore, we developed new primer sets targeting the *amoB*  
488 gene of comammox bacteria, specifically clade A comammox bacteria; the primary comammox  
489 clade detected in our study and in wastewater treatment systems by recent studies (Chao et al.  
490 2016, Pjevac et al. 2017, Roots et al. 2019, Spasov et al. 2019). The *amoB* gene exhibits  
491 phylogenetic clustering consistent with that of *amoA* gene and places comammox bacteria in a  
492 distinct cluster from all other ammonia oxidizers. Thus, we developed two primers sets targeting  
493 the *amoB* gene of comammox bacteria with an expected product size of 114 and 337 bp. Both  
494 primer sets resulted in high specificity (i.e., no unspecific amplification) (Figure 4C), high PCR  
495 efficiency (~94%) (Figure 4D), and a clean melting curve (Figure 4E). Further, the qPCR bases  
496 estimates of the ratio of comammox bacteria (determined using *amoB* specific primers) to total  
497 ammonia oxidizers was highly correlated for the ratio of comammox bacteria to total ammonia  
498 oxidizers determined using metagenomic data involving gene centric *de novo* assembly (Figure  
499 4F) and mapping of metagenomic reads to reference genomes (Figure 4G). This suggests that the  
500 newly designed primers are specific to clade A comammox bacteria and accurately capture their  
501 abundance in complex nitrifying communities.

502

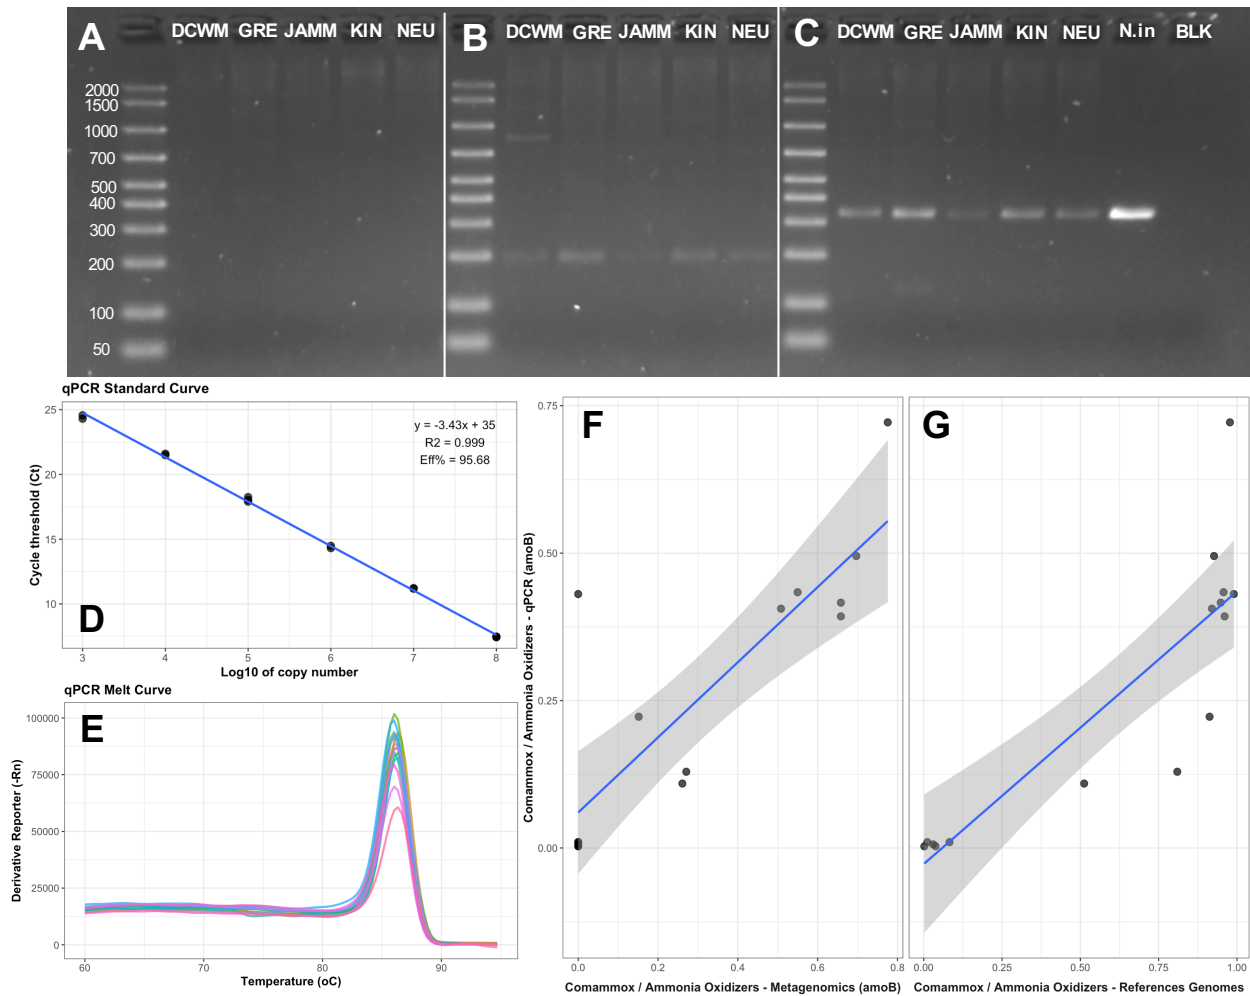

**Figure 4:** Previously published primer sets for the *amoA* gene of comammox bacteria, i.e. (A) *comaA*, and (B) *Ntspa-amoA*, result in non-detection and unspecific amplification samples from DCWM, GRE, JAMM, KIN, NEU where comammox bacteria were detected using metagenomics. In contrast the newly designed *amoB* specific primers (C) result in a single band formation of the right size for these samples which is consistent with that amplified from *Ca Nitrospira inopinata* (N.in). BLK stands for PCR negative control. The primers exhibit excellent PCR efficiency (D), demonstrate clean melting curves (E), and provide estimates of comammox bacterial abundance consistent with those seen in PCR-free metagenomics analyses (F, G).

503

### 504 3.5 Quantitative detection of nitrifying populations including comammox bacteria.

505 Initial assessment of qPCR results from the *amoA* assay for AOB underestimated AOB abundance  
 506 when compared to the qPCR data targeting the 16S rRNA gene for AOB (Supplemental Figure  
 507 S1). In contrast, 16S rRNA gene based qPCR estimates for AOB were consistent with those  
 508 obtained using metagenomics (Supplemental Figure S1). This issue was also reported by Dechesne  
 509 et al. (2016) (Dechesne et al. 2016) who indicated that *amoA* primer sets do not provide sufficient



510 coverage for AOB, while the 16S rRNA primer sets likely capture some non-AOB sequences as  
511 well. Our analyses suggest that while *amoA* primer sets did not provide sufficient coverage for  
512 AOB in our study, comparisons with metagenomic data indicated no evidence on unspecific non-  
513 AOB detection with 16S rRNA gene primers. As a result, all subsequent measurements of AOB  
514 were conducted using 16S rRNA gene based assays.

515

516 Canonical AOB and *Nitrospira* (including comammox and NOB) were detected in all systems  
517 irrespective of the nitrogen removal process configuration. The relative abundance of both groups  
518 ranges from 0.25 to 9% of total bacteria with an average of 1.71 and 1.65%, respectively, except  
519 for *Nitrospira* in the attached growth of JAMM/JAMMSM which reached a maximum relative  
520 abundance of 20% with an average of 8.56% (Figure 5A, B). For several systems, the abundance  
521 of *Nitrospira* in proportion to AOB was significantly and consistently above what would be  
522 expected if nitrification was being driven by AOB and NOB alone. These included the following  
523 ND systems: DCWM, attached growth phase of JAMM (i.e., JAMMSM), KIN, SND system:  
524 YAN, and PNA systems: attached growth phase of JAMS (i.e., JAMS). While comammox  
525 bacteria were detected in most systems with higher proportional abundance of *Nitrospira* over  
526 AOB (except for the PNA system: JAMS), the presence of comammox bacteria was not exclusive  
527 to them (Figure 5B). For instance, comammox bacteria were also detected in GRE and NEU where  
528 the abundance of *Nitrospira* and AOB were largely in line with expected proportions if nitrification  
529 was primarily driven by AOB and NOB (Costa et al. 2006). Comammox bacteria were not detected  
530 in four ND systems (ARM, BOA, NAN, YORM), one SND system (NAN), and the three PNA  
531 systems (DUR/DURSM, JAMS/JAMSSM, YORS), which was consistent with metagenomic  
532 observations. In all, comammox bacteria were detected in six ND systems (i.e., DCWM, GRE,  
533 NEU, WIL, KIN, JAM/JAMSM) and one SND system (i.e., YAN). The abundance of comammox  
534 bacteria in these systems ranged from 0.5% to ~3% of total bacteria in the suspended growth phase,  
535 while it was as high (as high as ~17%) in the attached phase of the IFAS systems (i.e., JAMMSM).  
536 In systems that included only suspended growth phase, comammox bacteria constituted between  
537 20-70% of all ammonia oxidizers (i.e., AOB + comammox) for the duration of the study, with  
538 abundances equal to that of AOB in two ND systems (i.e., GRE and NEU). The proportion of  
539 comammox bacteria to that of total ammonia oxidizers varied significantly for two systems with

540 low dissolved oxygen, i.e., KIN (ND) and YAN (SND), from 1 to 70% and at times significantly  
541 surpassed that of AOB.

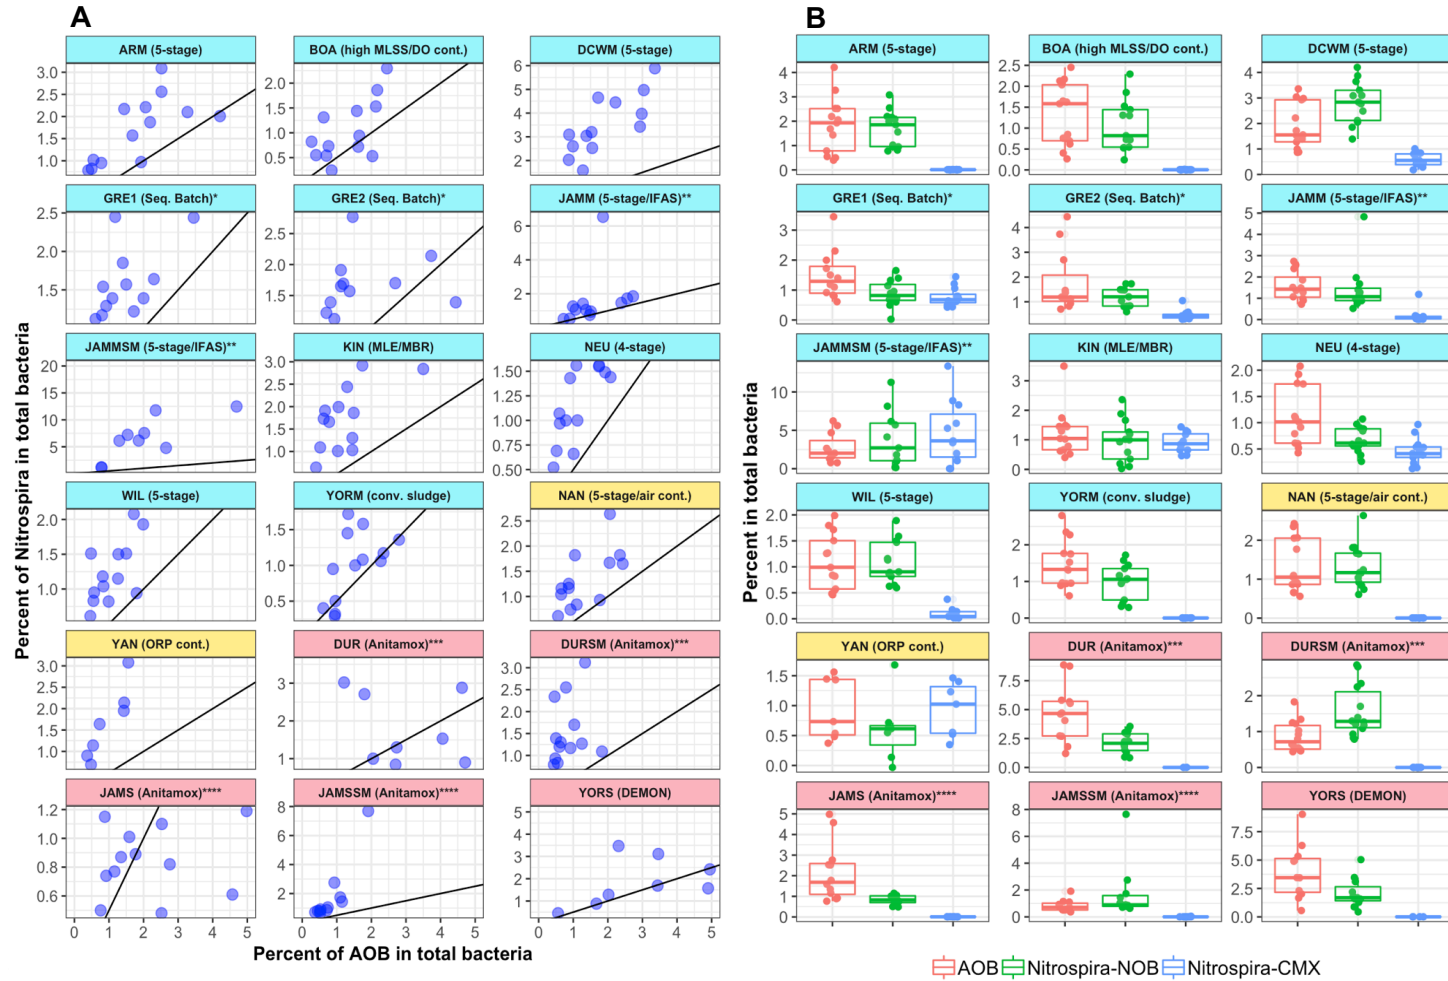

**Figure 5:** (A) Comparison of the abundance of Nitrospira (% of total bacteria) to that of AOB (% of total bacteria) indicates that several systems with higher proportional abundance of Nitrospira when compared to the theoretical estimates (black line) if nitrification was being driven by AOB and NOB. (B) The abundance of AOB, Nitrospira-NOB, and comammox bacteria as a proportional of total bacterial abundance indicates that comammox bacteria were (1) consistently detected in systems with metagenomic evidence of their presence, (2) their abundance was lower than AOB in suspended growth systems where they were detected and high in systems with attached growth phase. Asterisks levels indicate samples from the same system.

### 543 **3.6 Comammox bacterial abundance was strongly associated with solids retention time.**

544 Comammox bacteria were prevalent and temporally persistent in systems with long SRTs, despite  
545 fluctuations in SRT levels within each system. The abundance of comammox bacteria as a  
546 proportion of all ammonia oxidizers (i.e., comammox + AOB) increased with increasing median  
547 SRT of the system (Figure 6A, 6B), with high abundances on the attached growth phase of the  
548 IFAS systems at JAMM. Further, the mean ammonia removal was typically higher in systems with  
549 comammox bacterial present compared to those without comammox bacteria (Wilcoxon rank sum  
550 test,  $p < 0.0001$ ) (Figure 6C). And finally, while comammox bacterial abundance increased with  
551 SRT (Figure 6F) (Spearman's  $R = 0.52$ ,  $p < 0.0001$ ), the abundance of *Nitrospira*-NOB and AOB  
552 did not exhibit significant association with SRT (Figure 6D, E). This suggests that increases in  
553 comammox abundance may not be associated with a concomitant decrease in AOB or NOB  
554 concentrations.

555  
556 These data provide two potential insights into comammox bacterial relevance in nitrogen removal  
557 systems and their potential competitive dynamics or lack thereof with canonical nitrifiers. First, as  
558 stated earlier (section 3.3), comammox bacteria are preferentially enriched in systems with long  
559 SRT's and systems with an attached phase component. While the prevalence in long SRT systems  
560 may be explained by their slower net growth rates compared to canonical AOB and NOB (Kits et  
561 al. 2017, Lawson and Lückner 2018), this does not provide basis for explaining their preferential  
562 enrichment over AOB and NOB with increasing SRT. It is also important to note that the AOB  
563 and NOB abundances were not associated with a concomitant increase in comammox bacterial  
564 abundance suggests that these bacteria may occupy exclusive niches within the nitrifying  
565 consortium. For instance, AOB and comammox may occupy independent niches at different  
566 ammonia concentrations due to different affinity levels for ammonia (Kits et al. 2017, Lawson and  
567 Lückner 2018) which may allow for their co-existence. In fact, in three ND systems (i.e., DCWM,  
568 NEU and YAN) and the IFAS ND system (i.e., JAMMSM) the concentrations of AOB and  
569 comammox were positively correlated ( $R = 0.53$  (DCWM),  $0.41$  (NEU),  $0.91$  (YAN),  $0.60$   
570 (JAMMSM),  $p < 0.01$ ), suggesting the potential for some level of cooperation between the two.  
571 Further, like other lineage II *Nitrospira*, comammox bacteria demonstrate potential to exhibit  
572 diverse metabolic capacities (Daims et al. 2016, Lawson and Lückner 2018) including genes  
573 involved in urea uptake and urease for conversion of urea to ammonia (Daims et al. 2016, Koch et

574 al. 2015, Lawson and Lücker 2018). Thus, it is plausible that the combination of greater metabolic  
575 diversity (e.g., ability to utilize urea) and higher affinities for ammonia of comammox bacteria  
576 compared to that of AOB, may ensure that comammox bacteria may have preferential access to  
577 ammonia (or other electron donors) made available via increased biomass decay products at longer  
578 SRTs. This could likely explain the increase in the abundance of comammox bacteria and not AOB  
579 or NOB with increasing SRT.

580

581 The second insight is that systems with comammox bacteria may have higher ammonia removal  
582 efficiencies compared to nitrogen removal systems where they are absent. It is important to note  
583 that this statistically significant observation is confounded by the fact that systems with  
584 comammox bacteria also exhibited higher SRT. Thus, it is difficult to disentangle the role of  
585 comammox bacteria from that of SRT alone in explaining the differences in ammonia removal  
586 efficiency. Finally, we did not find any other significant correlations between comammox bacterial  
587 concentrations and proportions (of total bacteria and ammonia oxidizers) with any of the other  
588 measured process parameters except including loading rates, pH, temperature, and dissolved  
589 oxygen (DO) concentrations. The lack of association with DO concentrations is in contrast with  
590 previous studies (Beach and Noguera 2019, Roots et al. 2019). In fact, comammox bacteria were  
591 present and their abundances stable in systems with DO less than 1 mg/l (i.e., YAN, NEU) as well  
592 as those with DO levels significantly in excess of 2 mg/l (i.e., GRE, JAMM, WIL, KIN). It is  
593 important to note that correlations of comammox bacterial abundance and proportions with process  
594 parameters were estimated on a system-by-system basis, with a maximum of 12 data points per  
595 system. Thus, it is feasible that our correlation efforts were limited by the richness of our dataset  
596 on an individual system basis, where multiple factors may together play a role in influencing  
597 microbial community composition. Thus, while this does not eliminate the possibility that low DO  
598 levels (or other process parameters) impact comammox bacteria, it suggests that SRT plays a more  
599 prominent role compared to other process parameters in the selection of comammox bacteria in  
600 full-scale mainstream nitrogen removal systems.

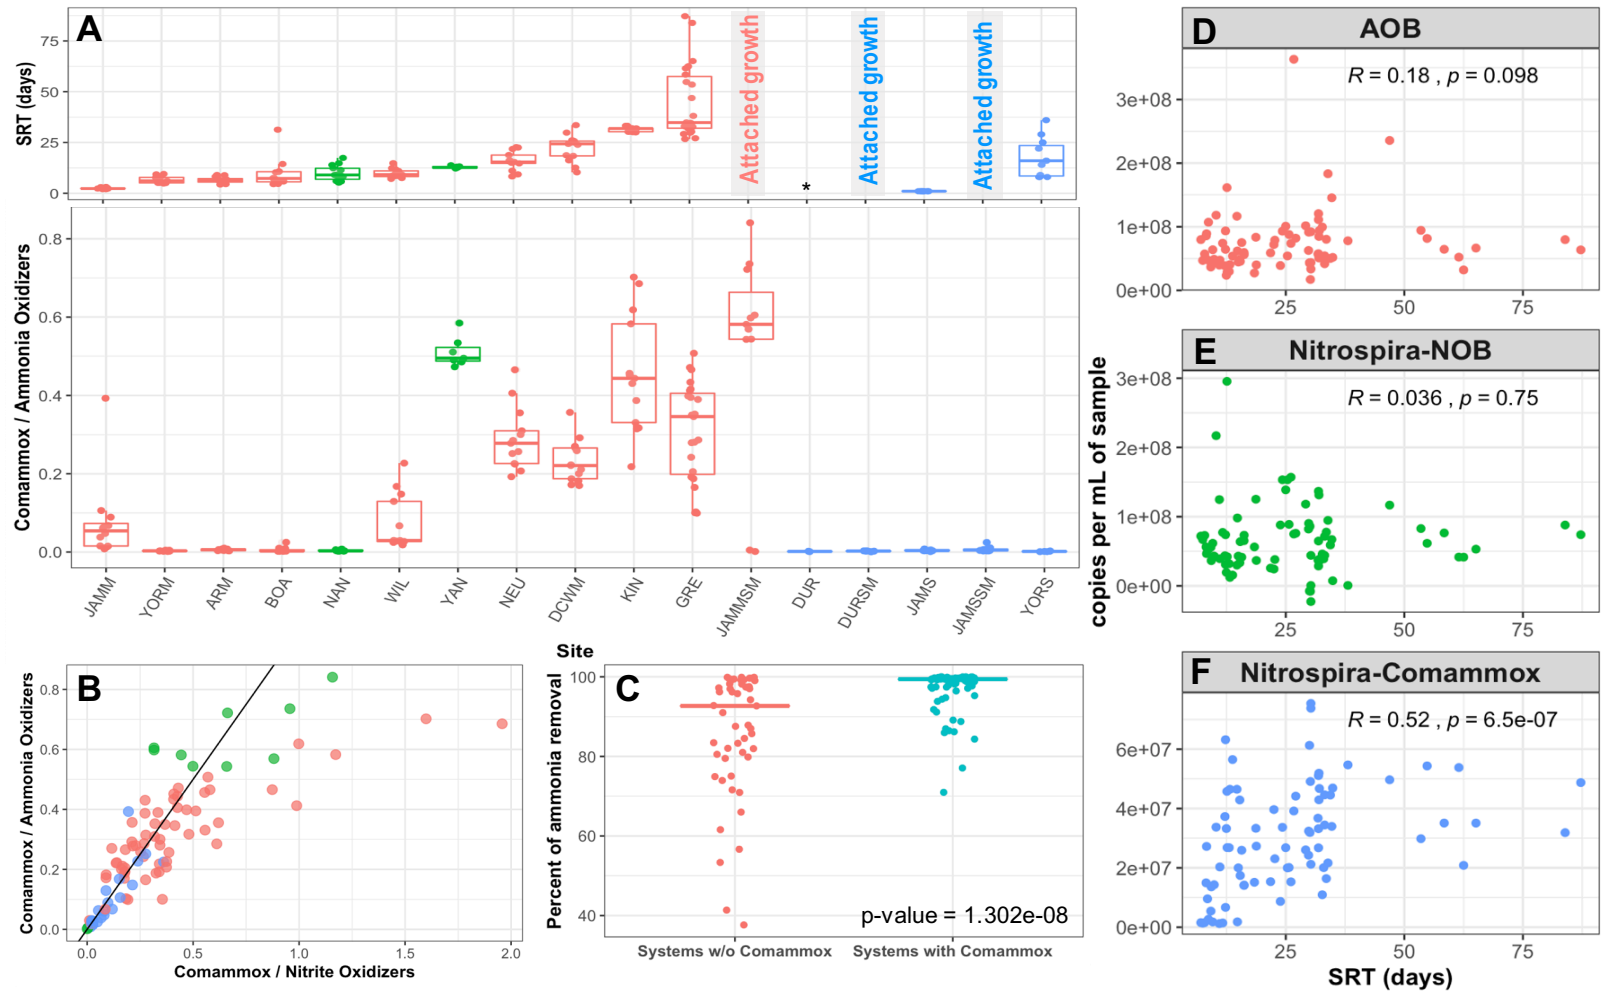

**Figure 6:** Increase in solids retention time (A) was associated with comammox bacteria constituting a greater proportion of all ammonia oxidizers (B). (C) Systems with comammox bacteria exhibited greater ammonia removal efficiencies compared to systems without comammox bacteria. This comparison does not include PNA systems. In contrast to AOB (D) and NOB (E), whose abundance was not associated with SRT, comammox bacterial abundance (F) was significantly and positively correlated with system SRT.

## 602 4.0 Conclusions

- 603 • Comammox bacteria were not prevalent in side-stream PNA systems, including single  
604 stage systems that contain attached growth and suspended phase components. This is  
605 likely to be associated with the high ambient ammonia concentrations in PNA systems.
- 606 • All comammox bacteria detected in full-scale systems belonged to clade A comammox  
607 bacteria and are closely associated with *Ca Nitrospira nitrosa*. This study provides a  
608 novel primer set and qPCR assay targeting the *amoB* gene of clade A comammox  
609 bacteria.
- 610 • Comammox bacteria were prevalent in full-scale mainstream nitrogen removal systems  
611 with long SRT's and/or systems with attached growth components. This finding is  
612 consistent with estimates of slower growth rates for comammox bacteria compared to  
613 canonical AOB and NOB.
- 614 • Increases in comammox bacterial abundance in systems with sufficient SRT and/or  
615 attached growth phase were not associated with a concomitant decrease in the abundance  
616 of canonical AOB or NOB indicating that they may occupy niche independent from that  
617 of canonical nitrifiers within complex nitrifying communities.
- 618 • We found no significant associations between DO concentrations and comammox  
619 presence/absence or concentration in this study. While this does not eliminate the  
620 possibility that low DO levels favor comammox bacteria in wastewater treatment  
621 systems, it suggests that SRT is the key variable driving the prevalence of comammox  
622 bacteria.

623

## 624 5.0 Acknowledgements

625 This research was supported by the Water Environment Reuse Foundation (Grant UR416) and The  
626 National Science Foundation (Award number: 1703089). The authors also acknowledge the  
627 operational personnel for assistance with sampling and process data sharing. The authors would  
628 also like to thank Prof. Kartik Chandran (Columbia University) and Prof. Holger Daims  
629 (University of Vienna) and Dr. Petra Pjevac (University of Vienna) for providing DNA extracts of  
630 *Nitrosomonas europaea* and *Ca Nitrospira inopinata*, respectively, for preparation for qPCR  
631 standards.

632

## 633 6.0 References

- 634 Altschul, S.F., Gish, W., Miller, W., Myers, E.W. and Lipman, D.J. (1990) Basic local alignment  
635 search tool. *Journal of Molecular Biology* 215(3), 403-410.
- 636 Annavajhala, M.K., Kapoor, V., Santo-Domingo, J. and Chandran, K. (2018) Comammox  
637 functionality identified in diverse engineered biological wastewater treatment systems.  
638 *Environmental Science & Technology Letters* 5(2), 110-116.
- 639 Aramaki, T., Blanc-Mathieu, R., Endo, H., Ohkubo, K., Kanehisa, M., Goto, S. and Ogata, H.  
640 (2019) KofamKOALA: KEGG ortholog assignment based on profile HMM and adaptive  
641 score threshold. *bioRxiv*, 602110.
- 642 Bankevich, A., Nurk, S., Antipov, D., Gurevich, A.A., Dvorkin, M., Kulikov, A.S., Lesin, V.M.,  
643 Nikolenko, S.I., Pham, S., Prjibelski, A.D., Pyshkin, A.V., Sirotkin, A.V., Vyahhi, N., Tesler,  
644 G., Alekseyev, M.A. and Pevzner, P.A. (2012) SPAdes: A new genome assembly algorithm  
645 and its applications to single-cell sequencing. *Journal of Computational Biology* 19(5), 455-  
646 477.
- 647 Bartelme, R.P., McLellan, S.L. and Newton, R.J. (2017) Freshwater recirculating aquaculture  
648 system operations drive biofilter bacterial community shifts around a stable nitrifying  
649 consortium of ammonia-oxidizing archaea and comammox nitrospira. *Frontiers in*  
650 *Microbiology* 8(101).
- 651 Beach, N.K. and Noguera, D.R. (2019) Design and assessment of species-level qPCR primers  
652 targeting comammox. *Frontiers in Microbiology* 10(36).
- 653 Bolger, A.M., Lohse, M. and Usadel, B. (2014) Trimmomatic: a flexible trimmer for Illumina  
654 sequence data. *Bioinformatics* 30(15), 2114-2120.
- 655 Buchfink, B., Xie, C. and Huson, D.H. (2015) Fast and sensitive protein alignment using  
656 DIAMOND. *Nature Methods* 12(1), 59-60.
- 657 Camejo, P.Y., Santo Domingo, J., McMahon, K.D. and Noguera, D.R. (2017) Genome-enabled  
658 insights into the ecophysiology of the comammox bacterium “*Candidatus Nitrospira*  
659 *nitrosa*”. *mSystems* 2(5), e00059-00017.
- 660 Campbell, B.J., Yu, L., Heidelberg, J.F. and Kirchman, D.L. (2011) Activity of abundant and  
661 rare bacteria in a coastal ocean. *Proceedings of the National Academy of Sciences* 108(31),  
662 12776.
- 663 Caporaso, J.G., Lauber, C.L., Walters, W.A., Berg-Lyons, D., Lozupone, C.A., Turnbaugh, P.J.,  
664 Fierer, N. and Knight, R. (2011) Global patterns of 16S rRNA diversity at a depth of millions  
665 of sequences per sample. *Proceedings of the National Academy of Sciences* 108(Supplement  
666 1), 4516-4522.
- 667 Chao, Y., Mao, Y., Yu, K. and Zhang, T. (2016) Novel nitrifiers and comammox in a full-scale  
668 hybrid biofilm and activated sludge reactor revealed by metagenomic approach. *Applied*  
669 *Microbiology and Biotechnology* 100(18), 8225-8237.
- 670 Cole, J.R., Wang, Q., Fish, J.A., Chai, B., McGarrell, D.M., Sun, Y., Brown, C.T., Porras-Alfaro,  
671 A., Kuske, C.R. and Tiedje, J.M. (2014) Ribosomal Database Project: data and tools for high  
672 throughput rRNA analysis. *Nucleic Acids Research* 42(Database issue), D633-D642.
- 673 Costa, E., Pérez, J. and Kreft, J.U. (2006) Why is metabolic labour divided in nitrification?  
674 *Trends in Microbiology* 14(5), 213-219.
- 675 Daims, H., Lebedeva, E.V., Pjevac, P., Han, P., Herbold, C., Albertsen, M., Jehmlich, N.,  
676 Palatinszky, M., Vierheilig, J., Bulaev, A., Kirkegaard, R.H., von Bergen, M., Rattei, T.,  
677 Bendinger, B., Nielsen, P.H. and Wagner, M. (2015) Complete nitrification by *Nitrospira*  
678 bacteria. *Nature* 528(7583), 504-509.



- 679 Daims, H., Lücker, S. and Wagner, M. (2016) A new perspective on microbes formerly known  
680 as Nitrite-Oxidizing bacteria. *Trends in Microbiology* 24(9), 699-712.
- 681 Dechesne, A., Musovic, S., Palomo, A., Diwan, V. and Smets, B.F. (2016) Underestimation of  
682 ammonia-oxidizing bacteria abundance by amplification bias in amoA-targeted qPCR.  
683 *Microbial Biotechnology* 9(4), 519-524.
- 684 Eddy, S.R. (2011) Accelerated profile HMM searches. *PLOS Computational Biology* 7(10),  
685 e1002195.
- 686 Edgar, R.C. (2004) MUSCLE: multiple sequence alignment with high accuracy and high  
687 throughput. *Nucleic Acids Research* 32(5), 1792-1797.
- 688 Eren, A.M., Esen, Ö.C., Quince, C., Vineis, J.H., Morrison, H.G., Sogin, M.L. and Delmont,  
689 T.O. (2015) Anvi'o: an advanced analysis and visualization platform for 'omics data. *PeerJ*  
690 3, e1319.
- 691 Fan, X.Y., Gao, J.F., Pan, K.L., Li, D.C. and Dai, H.H. (2017) Temporal dynamics of bacterial  
692 communities and predicted nitrogen metabolism genes in a full-scale wastewater treatment  
693 plant. *RSC Advances* 7(89), 56317-56327.
- 694 Fowler, S.J., Palomo, A., Dechesne, A., Mines, P.D. and Smets, B.F. (2018) Comammox  
695 Nitrospira are abundant ammonia oxidizers in diverse groundwater-fed rapid sand filter  
696 communities. *Environmental Microbiology* 20(3), 1002-1015.
- 697 Gonzalez-Martinez, A., Rodriguez-Sanchez, A., van Loosdrecht, M.C.M., Gonzalez-Lopez, J.  
698 and Vahala, R. (2016) Detection of comammox bacteria in full-scale wastewater treatment  
699 bioreactors using tag-454-pyrosequencing. *Environmental Science and Pollution Research*  
700 23(24), 25501-25511.
- 701 Graham, D., Knapp, C., Van Vleck, E., Bloor, K., Lane, T. and Graham, C. (2007) Experimental  
702 demonstration of chaotic instability in biological nitrification. *The ISME Journal* 1(5), 385-  
703 393.
- 704 Hermansson, A. and Lindgren, P.E. (2001) Quantification of ammonia-oxidizing bacteria in  
705 arable soil by Real-Time PCR. *Applied and Environmental Microbiology* 67(2), 972-976.
- 706 Hu, H.W. and He, J.Z. (2017) Comammox - a newly discovered nitrification process in the  
707 terrestrial nitrogen cycle. *Journal of Soils and Sediments* 17(12), 2709-2717.
- 708 Hyatt, D., Chen, G.L., LoCascio, P.F., Land, M.L., Larimer, F.W. and Hauser, L.J. (2010)  
709 Prodigal: prokaryotic gene recognition and translation initiation site identification. *BMC*  
710 *Bioinformatics* 11, 119.
- 711 Jain, C., Rodriguez-R, L.M., Phillippy, A.M., Konstantinidis, K.T. and Aluru, S. (2018) High  
712 throughput ANI analysis of 90K prokaryotic genomes reveals clear species boundaries.  
713 *Nature Communications* 9(1), 5114.
- 714 Juretschko, S., Timmermann, G., Schmid, M., Schleifer, K.H., Pommerening-Roser, A., Koops,  
715 H.P. and Wagner, M. (1998) Combined molecular and conventional analyses of nitrifying  
716 bacterium diversity in activated sludge: Nitrosococcus mobilis and Nitrospira-like bacteria as  
717 dominant populations. *Applied and Environmental Microbiology* 64(8), 3042-3051.
- 718 Kanehisa, M., Sato, Y., Kawashima, M., Furumichi, M. and Tanabe, M. (2016) KEGG as a  
719 reference resource for gene and protein annotation. *Nucleic Acids Research* 44(D1), D457-  
720 D462.
- 721 Kang, D.D., Froula, J., Egan, R. and Wang, Z. (2015) MetaBAT, an efficient tool for accurately  
722 reconstructing single genomes from complex microbial communities. *PeerJ* 3, e1165.

- 723 Kits, K.D., Sedlacek, C.J., Lebedeva, E.V., Han, P., Bulaev, A., Pjevac, P., Daebeler, A.,  
724 Romano, S., Albertsen, M., Stein, L.Y., Daims, H. and Wagner, M. (2017) Kinetic analysis  
725 of a complete nitrifier reveals an oligotrophic lifestyle. *Nature* 549, 269-272.
- 726 Klotz, M.G. and Stein, L.Y. (2008) Nitrifier genomics and evolution of the nitrogen cycle.  
727 *FEMS Microbiol Letters* 278(2), 146-156.
- 728 Koch, H., Lückner, S., Albertsen, M., Kitzinger, K., Herbold, C., Spieck, E., Nielsen, P.H.,  
729 Wagner, M. and Daims, H. (2015) Expanded metabolic versatility of ubiquitous nitrite-  
730 oxidizing bacteria from the genus *Nitrospira*. *Proceedings of the National Academy of*  
731 *Sciences* 112(36), 11371-11376.
- 732 Kowalchuk, G.A. and Stephen, J.R. (2001) Ammonia-oxidizing bacteria: a model for molecular  
733 microbial ecology. *Annual Review of Microbiology* 55, 485-529.
- 734 Langmead, B. and Salzberg, S.L. (2012) Fast gapped-read alignment with Bowtie 2. *Nature*  
735 *Methods* 9, 357-359.
- 736 Lawson, C.E. and Lückner, S. (2018) Complete ammonia oxidation: an important control on  
737 nitrification in engineered ecosystems? *Current Opinion in Biotechnology* 50, 158-165.
- 738 Li, H. and Durbin, R. (2010) Fast and accurate long-read alignment with Burrows–Wheeler  
739 transform. *Bioinformatics* 26(5), 589-595.
- 740 Li, H., Handsaker, B., Wysoker, A., Fennell, T., Ruan, J., Homer, N., Marth, G., Abecasis, G.,  
741 Durbin, R. and Subgroup, G.P.D.P. (2009) The sequence alignment/map format and  
742 SAMtools. *Bioinformatics* 25(16), 2078-2079.
- 743 Matsen, F.A., Kodner, R.B. and Armbrust, E.V. (2010) pplacer: linear time maximum-likelihood  
744 and Bayesian phylogenetic placement of sequences onto a fixed reference tree. *BMC*  
745 *Bioinformatics* 11, 538.
- 746 McIlroy, S.J., Saunders, A.M., Albertsen, M., Nierychlo, M., McIlroy, B., Hansen, A.A., Karst,  
747 S.M., Nielsen, J.L. and Nielsen, P.H. (2015) MiDAS: the field guide to the microbes of  
748 activated sludge. *Database* 2015.
- 749 Miller, C., Baker, B., Thomas, B., Singer, S. and Banfield, J. (2011) EMIRGE: reconstruction of  
750 full-length ribosomal genes from microbial community short read sequencing data. *Genome*  
751 *Biology* 12(5), R44.
- 752 Nurk, S., Meleshko, D., Korobeynikov, A. and Pevzner, P.A. (2017) metaSPAdes: a new  
753 versatile metagenomic assembler. *Genome Research* 27(5), 824-834.
- 754 Orellana, L.H., Hatt, J.K., Iyer, R., Chourey, K., Hettich, R.L., Spain, J.C., Yang, W.H., Chee-  
755 Sanford, J.C., Sanford, R.A., Löffler, F.E. and Konstantinidis, K.T. (2018) Comparing DNA,  
756 RNA and protein levels for measuring microbial activity in nitrogen-amended soils. *bioRxiv*,  
757 466680.
- 758 Palomo, A., Jane Fowler, S., Gulay, A., Rasmussen, S., Sicheritz-Pontén, T. and Smets, B.F.  
759 (2016) Metagenomic analysis of rapid gravity sand filter microbial communities suggests  
760 novel physiology of *Nitrospira* spp. *The ISME Journal* 10(11), 2569-2581.
- 761 Palomo, A., Pedersen, A.G., Fowler, S.J., Dechesne, A., Sicheritz-Pontén, T. and Smets, B.F.  
762 (2018) Comparative genomics sheds light on niche differentiation and the evolutionary  
763 history of comammox *Nitrospira*. *The ISME Journal* 12(7), 1779-1793.
- 764 Parks, D.H., Chuvochina, M., Waite, D.W., Rinke, C., Skarshewski, A., Chaumeil, P.-A. and  
765 Hugenholtz, P. (2018) A standardized bacterial taxonomy based on genome phylogeny  
766 substantially revises the tree of life. *Nature Biotechnology* 36, 996-1004.

- 767 Parks, D.H., Imelfort, M., Skennerton, C.T., Hugenholtz, P. and Tyson, G.W. (2015) CheckM:  
768 assessing the quality of microbial genomes recovered from isolates, single cells, and  
769 metagenomes. *Genome Research* 25(7),1043-55.
- 770 Pericard, P., Dufresne, Y., Couderc, L., Blanquart, S. and Touzet, H. (2018) MATAM:  
771 reconstruction of phylogenetic marker genes from short sequencing reads in metagenomes.  
772 *Bioinformatics* 34(4):585-591.
- 773 Pinto, A.J., Marcus, D.N., Ijaz, U.Z., Bautista-de lose Santos, Q.M., Dick, G.J. and Raskin, L.  
774 (2015) Metagenomic Evidence for the Presence of Comammox Nitrospira-Like Bacteria in a  
775 Drinking Water System. *mSphere* 1(1), e00054-00015.
- 776 Pjevac, P., Schaubberger, C., Poghosyan, L., Herbold, C.W., van Kessel, M.A.H.J., Daebeler, A.,  
777 Steinberger, M., Jetten, M.S.M., Lückner, S., Wagner, M. and Daims, H. (2017) AmoA-  
778 targeted polymerase chain reaction primers for the specific detection and quantification of  
779 comammox nitrospira in the environment. *Frontiers in Microbiology* 8(1508).
- 780 Poghosyan, L., Koch, H., Lavy, A., Frank, J., van Kessel, M.A.H.J., Jetten, M.S.M., Banfield,  
781 J.F. and Lückner, S. (2019) Metagenomic recovery of two distinct comammox Nitrospira from  
782 the terrestrial subsurface. *Environmental Microbiology*.
- 783 Price, M.N., Dehal, P.S. and Arkin, A.P. (2010) Fasttree 2 – approximately maximum-likelihood  
784 trees for large alignments. *PLoS ONE* 5(3): e9490.
- 785 Prosser, J.I. and Nicol, G.W. (2008) Relative contributions of archaea and bacteria to aerobic  
786 ammonia oxidation in the environment. *Environmental Microbiology* 10(11), 2931-2941.
- 787 Quast, C., Pruesse, E., Yilmaz, P., Gerken, J., Schweer, T., Yarza, P., Peplies, J. and Glöckner,  
788 F.O. (2013) The SILVA ribosomal RNA gene database project: Improved data processing  
789 and web-based tools. *Nucleic Acids Research* 41, 590-596.
- 790 RCoreTeam (2014) R: A language and environment for statistical computing R foundation for  
791 statistical computing, Vienna, Austria.
- 792 Roots, P., Wang, Y., Rosenthal, A.F., Griffin, J.S., Sabba, F., Petrovich, M., Yang, F., Kozak,  
793 J.A., Zhang, H. and Wells, G.F. (2019) Comammox Nitrospira are the dominant ammonia  
794 oxidizers in a mainstream low dissolved oxygen nitrification reactor. *Water Research* 157,  
795 396-405.
- 796 Rothauwe, J.H., Witzel, K.P. and Liesack, W. (1997) The ammonia monooxygenase structural  
797 gene amoA as a functional marker: molecular fine-scale analysis of natural ammonia-  
798 oxidizing populations. *Applied and Environmental Microbiology* 63(12), 4704-4712.
- 799 Saunders, A.M., Albertsen, M., Vollertsen, J. and Nielsen, P.H. (2016) The activated sludge  
800 ecosystem contains a core community of abundant organisms. *The ISME Journal* 10(1), 11-  
801 20.
- 802 Siripong, S. and Rittmann, B.E. (2007) Diversity study of nitrifying bacteria in full-scale  
803 municipal wastewater treatment plants. *Water Research* 41(5), 1110-1120.
- 804 Spasov, E., Tsuji, J.M., Hug, L.A., Doxey, A.C., Sauder, L.A., Parker, W.J. and Neufeld, J.D.  
805 (2019) Comammox bacteria are dominant ammonia oxidizers in rotating biological  
806 contactors of a municipal wastewater treatment plant. *bioRxiv*, 529826.
- 807 Stahl, D.A., Torre, J.R.d.l., SM, A. and JI, P. (2012) Physiology and diversity of ammonia-  
808 oxidizing archaea urease activity in neutrophilic autotrophic ammonia-oxidizing bacteria  
809 isolated from acid soils. *Annual Review of Microbiology* 66(1), 83-101.
- 810 Stamatakis, A. (2014) RAxML Version 8: A tool for phylogenetic analysis and post-analysis of  
811 large phylogenies. *Bioinformatics* 30(9):1312-1313.

- 812 Tatari, K., Musovic, S., Gülay, A., Dechesne, A., Albrechtsen, H.-J. and Smets, B.F. (2017)  
813 Density and distribution of nitrifying guilds in rapid sand filters for drinking water  
814 production: Dominance of *Nitrospira* spp. *Water Research* 127, 239-248.
- 815 van Kessel, M.A.H.J., Speth, D.R., Albertsen, M., Nielsen, P.H., Op den Camp, H.J.M., Kartal,  
816 B., Jetten, M.S.M. and Lückner, S. (2015) Complete nitrification by a single microorganism.  
817 *Nature* 528(7583), 555-559.
- 818 Wang, M., Huang, G., Zhao, Z., Dang, C., Liu, W. and Zheng, M. (2018) Newly designed primer  
819 pair revealed dominant and diverse comammox *amoA* gene in full-scale wastewater  
820 treatment plants. *Bioresource Technology* 270, 580-587.
- 821 Wang, Q., Garrity, G., Tiedje, J. and Cole, J. (2007) Naive Bayesian classifier for rapid  
822 assignment of rRNA sequences into the new bacterial taxonomy. *Applied and Environmental*  
823 *Microbiology* 73(16), 5261-5267.
- 824 Wang, Y., Ma, L., Mao, Y., Jiang, X., Xia, Y., Yu, K., Li, B. and Zhang, T. (2017) Comammox  
825 in drinking water systems. *Water Research* 116, 332-341.
- 826 Wick, R.R., Judd, L.M., Gorrie, C.L. and Holt, K.E. (2017) Unicycler: Resolving bacterial  
827 genome assemblies from short and long sequencing reads. *PLOS Computational Biology*  
828 13(6), e1005595.
- 829 Wickham, H. (2009). *ggplot2: elegant graphics for data analysis*. New York: Springer.
- 830 Wu, L., Ning, D., Zhang, B., Li, Y., Zhang, P., Shan, X., Zhang, Q., Brown, M., Li, Z., Van  
831 Nostrand, J.D., Ling, F., Xiao, N., Zhang, Y., Vierheilig, J., Wells, G.F., Yang, Y., Deng, Y.,  
832 Tu, Q., Wang, A., Global Water Microbiome Consortium, Zhang, T., He, Z., Keller, J.,  
833 Nielsen, P.H., Alvarez, P.J.J., Criddle, C.S., Wagner, M., Tiedje, J.M., He, Q., Curtis, T.P.,  
834 Stahl, D.A., Alvarez-Cohen, L., Rittmann, B.E., Wen, X. and Zhou, J. (2019) Global  
835 diversity and biogeography of bacterial communities in wastewater treatment plants. *Nature*  
836 *Microbiology* 4, 1183-1195.
- 837 Xia, F., Wang, J.G., Zhu, T., Zou, B., Rhee, S.K. and Quan, Z.X. (2018) Ubiquity and diversity  
838 of complete ammonia oxidizers (comammox). *Applied and Environmental Microbiology*  
839 84(24), e01390-01318.
